# Supplementary material for: Slow magnetic relaxation in a homoaxially phosphine oxide coordinated pentagonal bipyramidal Dy(iii) complex
Source: Royal Society of Chemistry journal article supplement (doi:10.1039/d2dt03789k), 2023-01-01
Supplement: d2dt03789k1.pdf [file d2dt03789k1.pdf]

## *Supporting Information*

# **Slow Magnetic Relaxation in a Homoaxially Phosphine oxide Coordinated Pentagonal Bipyramidal Dy(III) Complex**

*Pankaj Kalita,<sup>a</sup> Naushad Ahmed,<sup>a,⊥</sup> Shruti Moorthy,<sup>b,⊥</sup> Viginie Béreau,<sup>c,d</sup> Arun Kumar Bar,<sup>e</sup>  
Pawan Kumar,<sup>f</sup> Prakash Nayak,<sup>g</sup> Jean-Pascal Sutter\*<sup>c</sup> Saurabh Kumar Singh\*<sup>b</sup> and Vadapalli  
Chandrasekhar\*<sup>a,f</sup>*

*<sup>a</sup> Tata Institute of Fundamental Research, 36/P, Gopanpally Village, Serilingampally Mandal,  
Ranga Reddy District, Hyderabad 500046. Email: [vc@tifr.res.in](mailto:vc@tifr.res.in); [vc@iitk.ac.in](mailto:vc@iitk.ac.in)*

*<sup>b</sup> Department of Chemistry, Indian Institute of Technology Hyderabad, Kandi-502284, Kandi,  
Sangareddy, Telangana, India. Email: [sksingh@chy.iith.ac.in](mailto:sksingh@chy.iith.ac.in)*

*<sup>c</sup> Laboratoire de Chimie de Coordination du CNRS, Université de Toulouse, CNRS, Toulouse,  
France. Email: [jean-pascal.sutter@lcc-toulouse.fr](mailto:jean-pascal.sutter@lcc-toulouse.fr)*

*<sup>d</sup> Université de Toulouse, Institut Universitaire de Technologie Paul Sabatier-Département de  
Chimie, Av. Georges Pompidou, , F-81104 Castres, France*

*<sup>e</sup> Department of Chemistry, Indian Institute of Science Education and Research (IISER)  
Tirupati, Tirupati, Andhra Pradesh 501507, India*

*<sup>f</sup> Department of Chemistry, IIT Kanpur, Kanpur 208016, India*

*<sup>g</sup> School of Chemical Sciences, National Institute of Science Education and Research, HBNI,  
Bhubaneswar 752050, India*

*<sup>⊥</sup> Authors contributed equally*

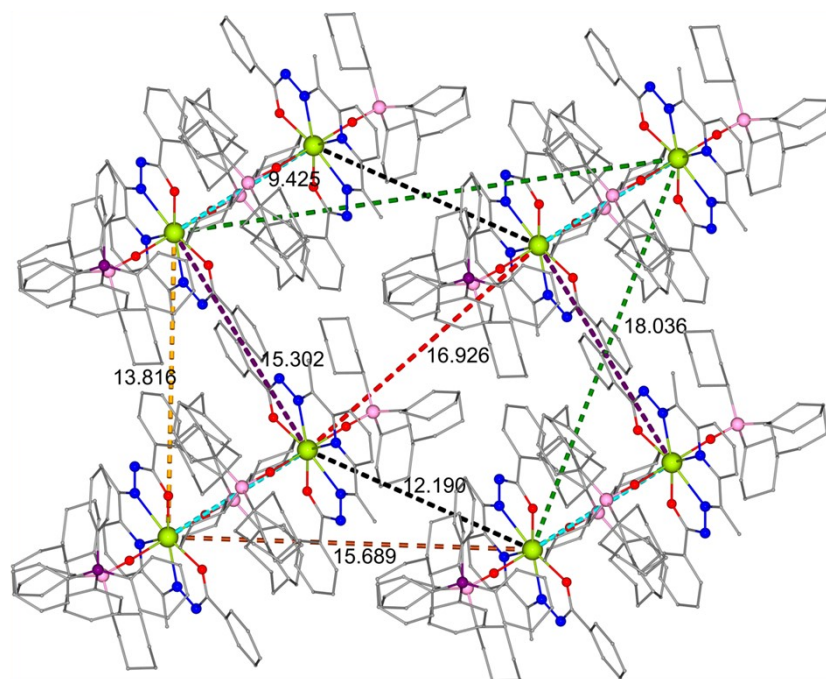

**Figure S1.** Illustration of intermolecular distances in **1-Dy**.

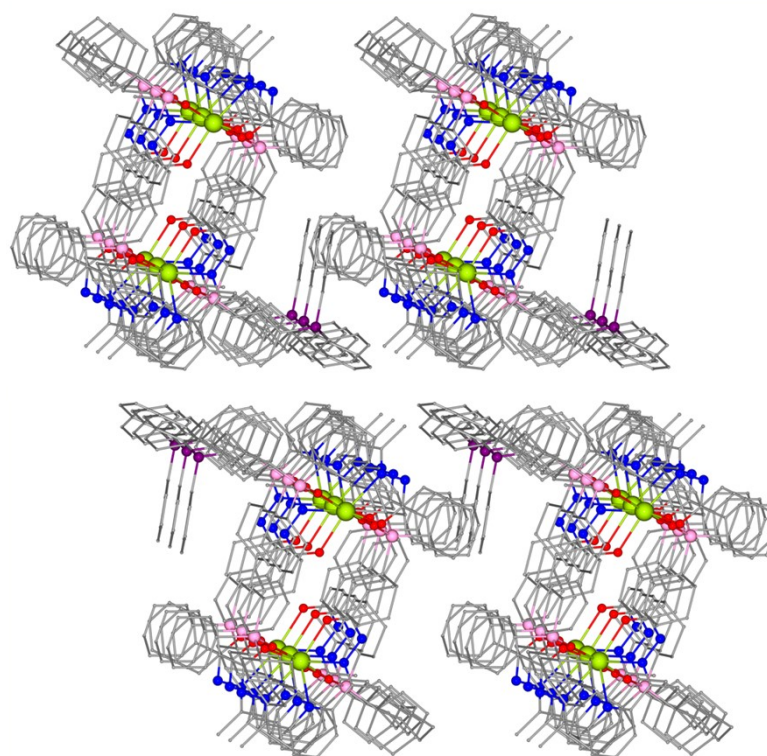

**Figure S2.** Solid state packing diagram of **1-Dy** viewed along the crystallographic *b* axis.

**Table S1.** Continuous Shape analysis

| Complex                                                | Structure <sup>1</sup> |        |              |       |        |         |         | Ref              |
|--------------------------------------------------------|------------------------|--------|--------------|-------|--------|---------|---------|------------------|
|                                                        | HP-7                   | HPY-7  | PBPY-7       | COC-7 | CTPR-7 | JPBPY-7 | JETPY-7 |                  |
| [(L)Dy(Cy <sub>3</sub> PO) <sub>2</sub> ] <sup>+</sup> | 31.572                 | 20.654 | <b>1.396</b> | 8.067 | 6.207  | 6.487   | 4.108   | <b>This work</b> |
| [(L)Dy(Cy <sub>3</sub> PO)Cl]                          |                        |        | <b>1.446</b> |       |        |         |         | [ <sup>1</sup> ] |
| [(L)Dy(Ph <sub>3</sub> PO)Cl]                          |                        |        | <b>1.505</b> |       |        |         |         | [ <sup>1</sup> ] |
| (L')DyCl <sub>2</sub>                                  |                        |        | <b>1.210</b> |       |        |         |         | [ <sup>2</sup> ] |

<sup>1</sup>HP-7: Heptagon ( $D_{7h}$ ); HPY-7: Hexagonal pyramid ( $C_{6v}$ ); PBPY-7: Pentagonal bipyramid ( $D_{5h}$ ); COC-7: Capped octahedron ( $C_{3v}$ ); CTPR-7: Capped trigonal prism ( $C_{2v}$ ); JPBPY-7: Johnson pentagonal bipyramid J13 ( $D_{5h}$ ); JETPY-7: Johnson elongated triangular pyramid J7 ( $C_{3v}$ )

**Table S2.** Bond angle and distance parameters of **1-Dy**

| <b>Bond lengths (Å)</b> |          | <b>Bond angles (°)</b> |            |           |            |
|-------------------------|----------|------------------------|------------|-----------|------------|
| Dy1–O1                  | 2.241(3) | O1–Dy1–O3              | 93.17(10)  | O1–Dy1–O4 | 90.55(10)  |
| Dy1–O2                  | 2.222(3) | O1–Dy1–N2              | 89.88(11)  | O1–Dy1–N3 | 85.95(11)  |
| Dy1–O3                  | 2.282(3) | O1–Dy1–N4              | 86.28(11)  | O2–Dy1–O1 | 175.33(10) |
| Dy1–O4                  | 2.262(3) | O2–Dy1–O3              | 88.74(11)  | O2–Dy1–O4 | 93.28(11)  |
| Dy1–N2                  | 2.444(3) | O2–Dy1–N2              | 87.06(12)  | O2–Dy1–N3 | 89.56(12)  |
| Dy1–N3                  | 2.467(3) | O2–Dy1–N4              | 92.92(11)  | O3–Dy1–N2 | 65.11(11)  |
| Dy1–N4                  | 2.466(3) | O3–Dy1–N3              | 129.81(11) | O3–Dy1–N4 | 165.84(11) |
|                         |          | O4–Dy1–O3              | 100.74(9)  | O4–Dy1–N2 | 165.84(11) |
|                         |          | O4–Dy1–N3              | 129.43(11) | O4–Dy1–N4 | 65.14(10)  |
|                         |          | N2–Dy1–N3              | 64.71(12)  | N2–Dy1–N4 | 129.00(12) |
|                         |          | N4–Dy1–N3              | 64.30(12)  |           |            |

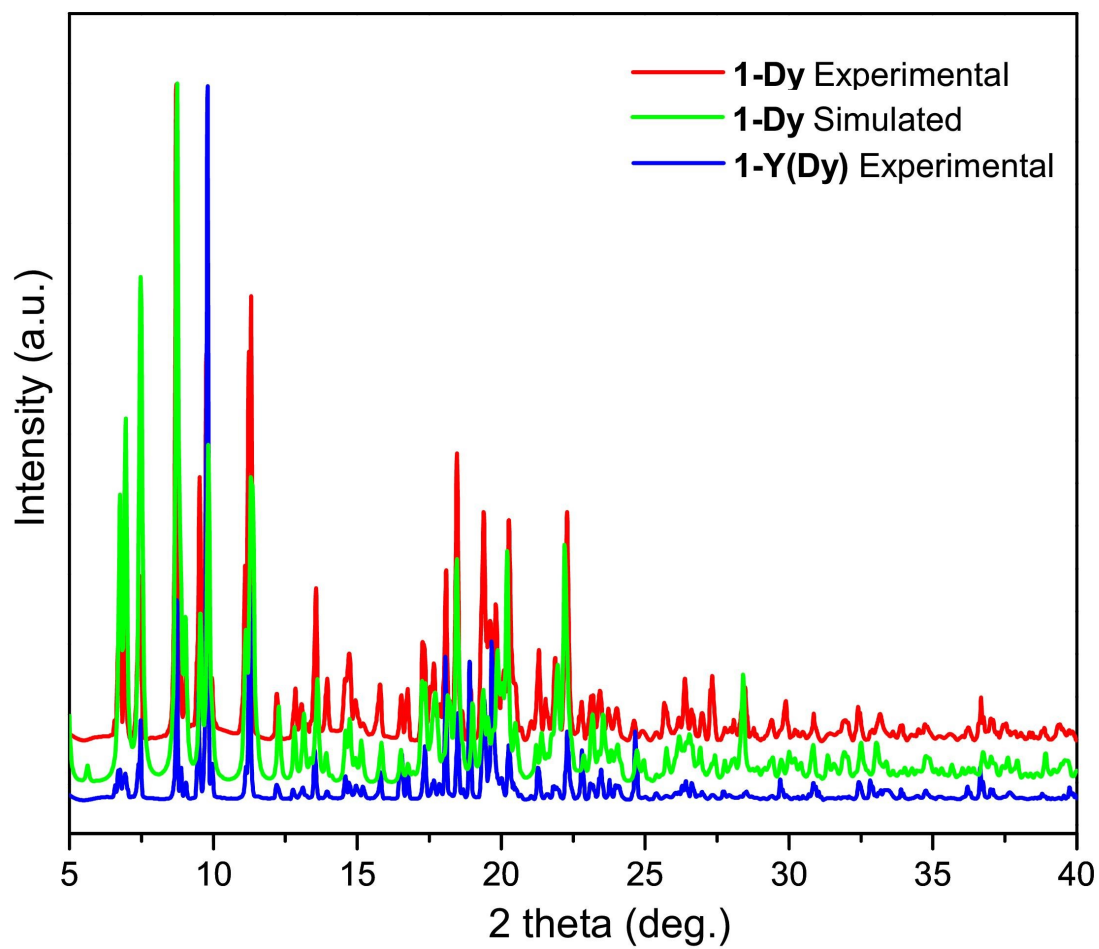

**Figure S3.** Experimental powder XRD pattern and simulated powder XRD from single crystal data for **1-Dy** along with experimental pattern of **1-Y(Dy)**.

**Figure S4.** Magnetic behavior for **1-Dy**: (a)  $M = f(H)$  for  $T = 2, 3, 4,$  and  $6$  K (full lines are eye guides); (b)  $M = f(H)$  at  $2$  K for **1-Dy** and **1-Y(Dy)**; (c)  $\chi_M'$  and  $\chi_M'' = f(T)$  for AC frequency of  $1$  kOe in absence and with applied static field ( $2$  kOe); (d) DC field dependence of the relaxation time ( $\tau$ ) at  $5$  K.

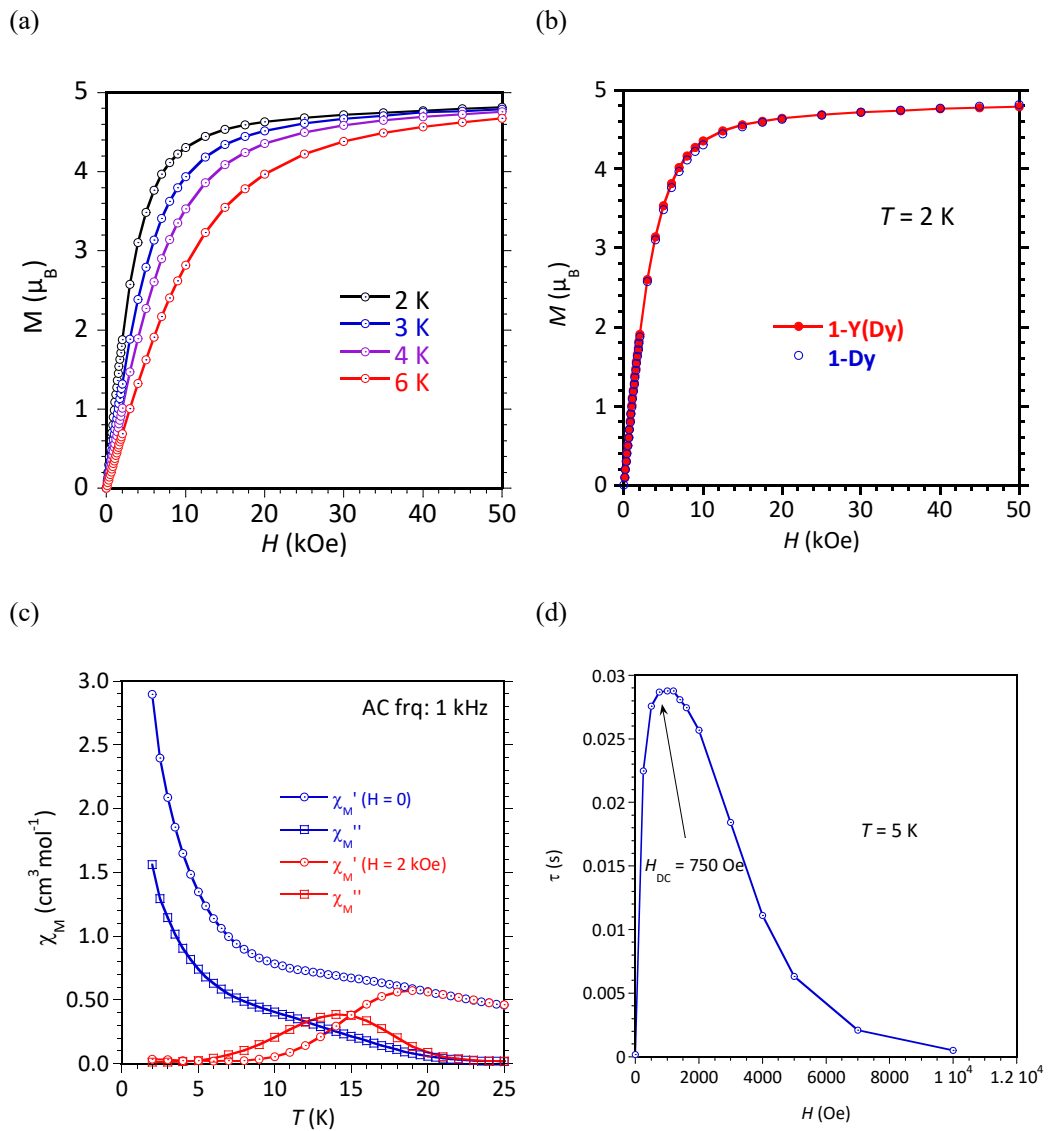

**Figure S5.** AC susceptibility behaviors for **1-Dy** recorded with  $H_{DC} = 750$  Oe

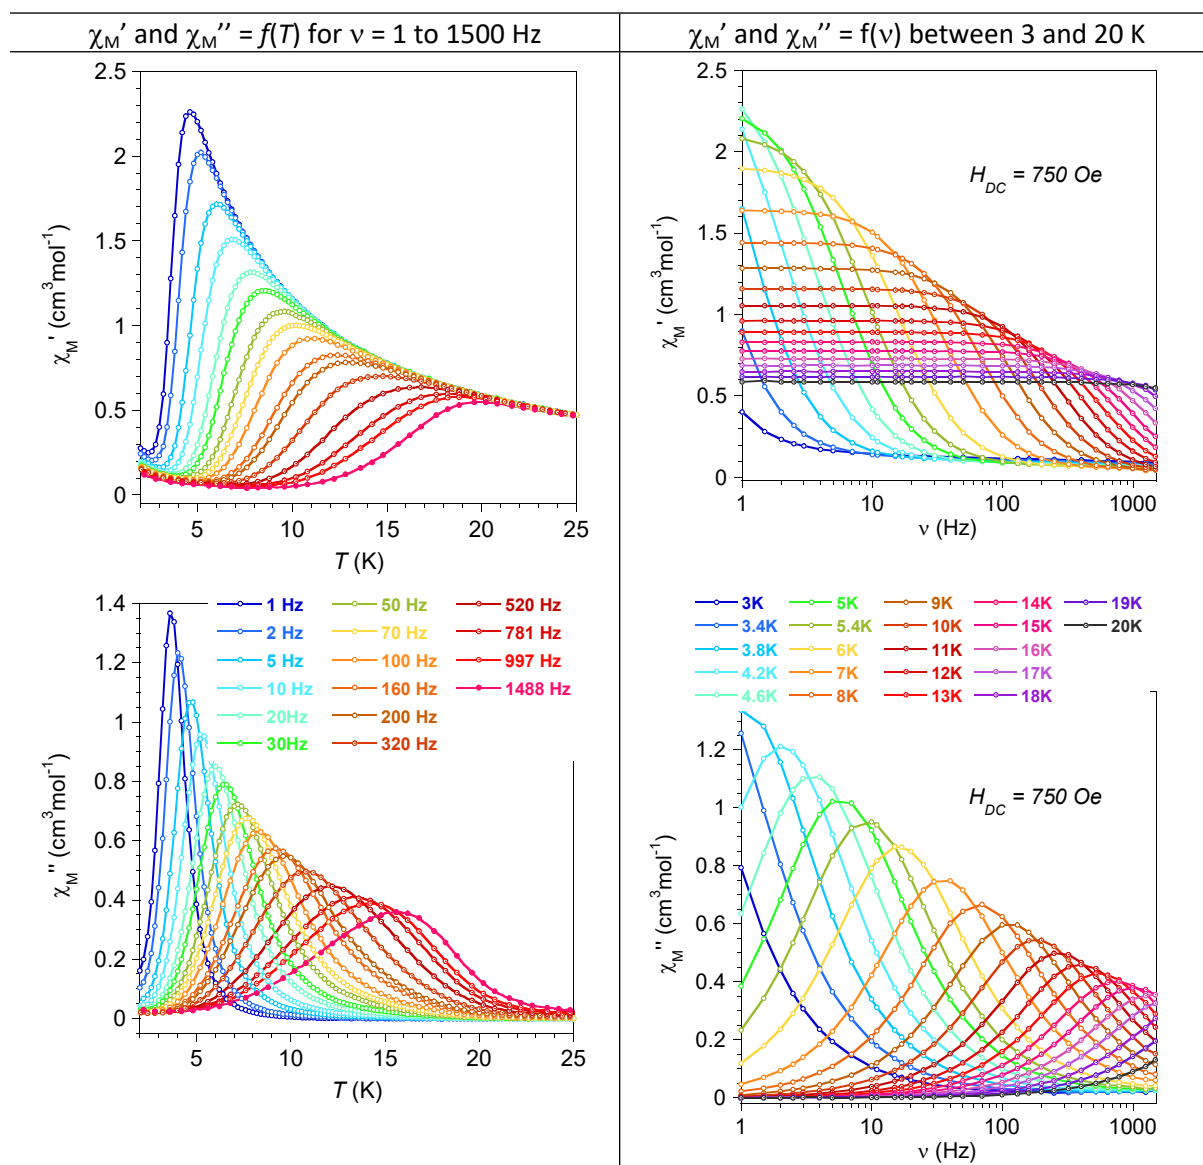

**Figure S6. 1-Dy:** Cole-Cole plot; (a, b) solid lines are the best-fits of the assessments of the distribution width ( $\alpha$ ) of the relaxation time for the different temperatures; (c) normalized plot (the lines are just eye-guides). (*Below*) the  $\alpha$  values for the temperatures between 4.0 and 16.0 K.

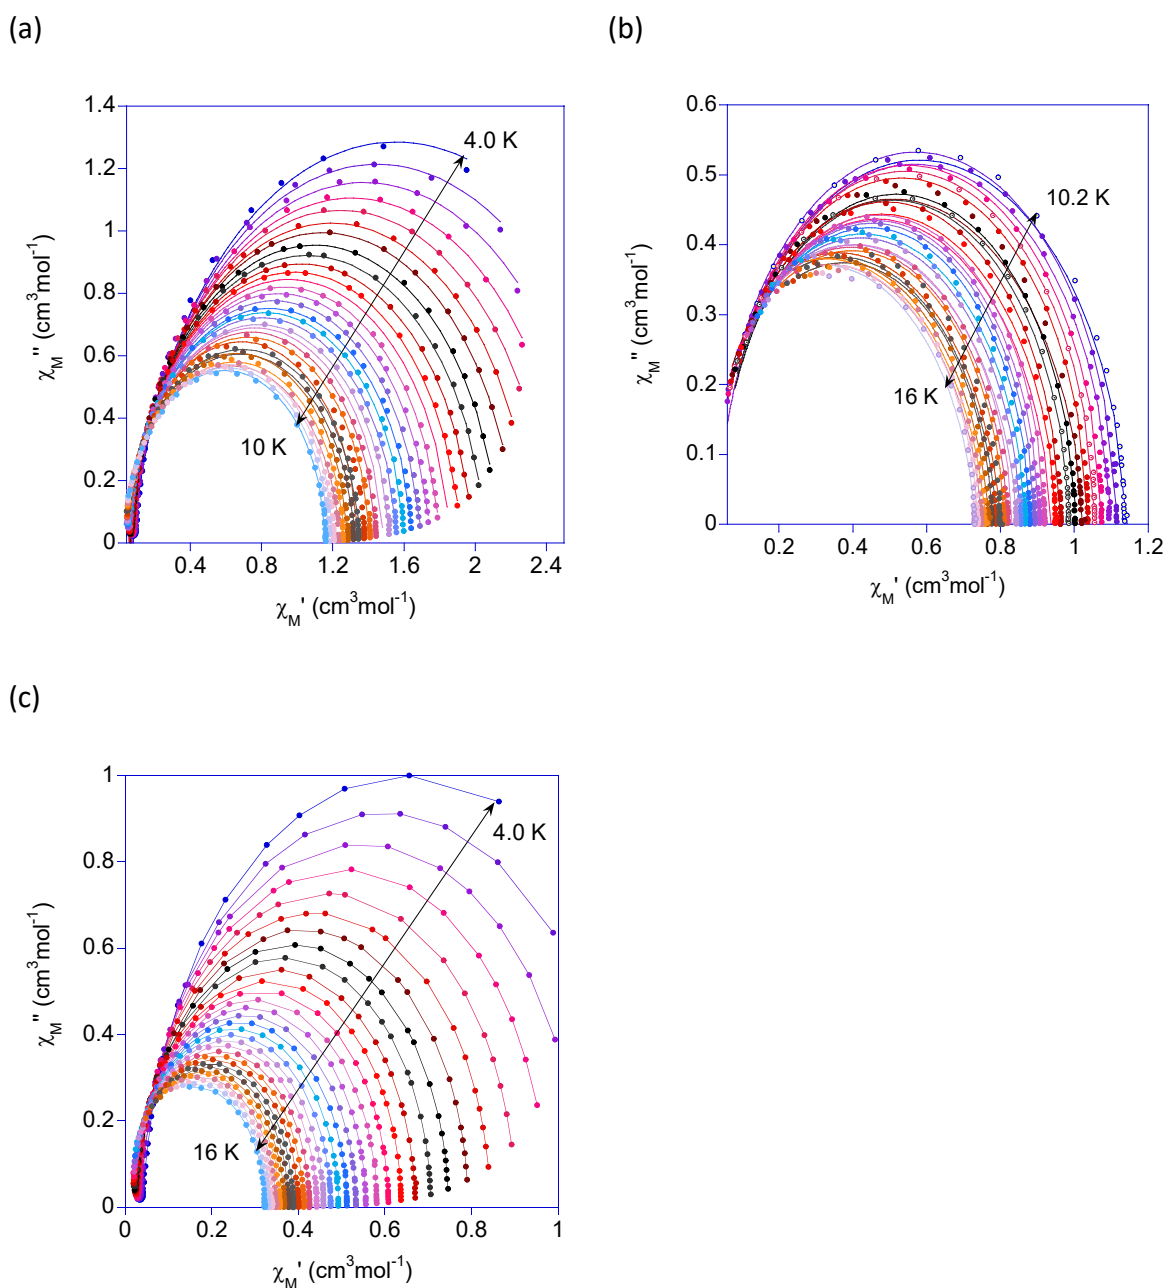



| T (K) | $\alpha$ | T (K) | $\alpha$ | T (K) | $\alpha$ |
|-------|----------|-------|----------|-------|----------|
| 4.0   | 0.089    | 7.6   | 0.037    | 11.2  | 0.012    |
| 4.2   | 0.079    | 7.8   | 0.029    | 11.4  | 0.066    |
| 4.4   | 0.078    | 8.0   | 0.025    | 11.6  | 0.016    |
| 4.6   | 0.072    | 8.2   | 0.027    | 11.8  | 0.021    |
| 4.8   | 0.063    | 8.4   | 0.026    | 12.0  | 0.016    |
| 5.0   | 0.054    | 8.6   | 0.040    | 12.2  | 0.043    |
| 5.2   | 0.055    | 8.8   | 0.042    | 12.4  | 0.050    |
| 5.4   | 0.054    | 9.0   | 0.019    | 12.6  | 0.012    |
| 5.6   | 0.053    | 9.2   | 0.043    | 12.8  | 0.016    |
| 5.8   | 0.050    | 9.4   | 0.045    | 13.0  | 0.012    |
| 6.0   | 0.046    | 9.6   | 0.018    | 13.2  | 0.013    |
| 6.2   | 0.043    | 9.8   | 0.018    | 13.4  | 0.038    |
| 6.4   | 0.041    | 10.0  | 0.014    | 13.6  | 0.038    |
| 6.6   | 0.038    | 10.2  | 0.049    | 13.8  | 0.072    |
| 6.8   | 0.039    | 10.4  | 0.014    | 14.0  | 0.037    |
| 7.0   | 0.043    | 10.6  | 0.019    |       |          |
| 7.2   | 0.035    | 10.8  | 0.012    |       |          |
| 7.4   | 0.032    | 11.0  | 0.012    |       |          |

**Table S3:** best-fit parameters for the analysis of  $\chi_M'' = f(\text{freq})$  by the extended Debye model.

| T (K) | X <sub>T</sub> | X <sub>S</sub> | Tau (s)    | alpha |
|-------|----------------|----------------|------------|-------|
| 3.8   | 3.39           | 0.71           | 0.144      | 0.075 |
| 4.0   | 3.33           | 0.77           | 0.105      | 0.079 |
| 4.2   | 3.38           | 0.72           | 0.0778     | 0.054 |
| 4.4   | 3.32           | 0.78           | 0.0586     | 0.054 |
| 4.6   | 3.26           | 0.83           | 0.0447     | 0.053 |
| 4.8   | 3.21           | 0.88           | 0.0346     | 0.051 |
| 5.0   | 3.17           | 0.93           | 0.02723    | 0.050 |
| 5.2   | 3.13           | 0.97           | 0.02170    | 0.049 |
| 5.4   | 3.08           | 1.02           | 0.01747    | 0.047 |
| 5.6   | 3.05           | 1.05           | 0.01425    | 0.046 |
| 5.8   | 3.01           | 1.09           | 0.01174    | 0.045 |
| 6.0   | 2.92           | 1.17           | 0.00980    | 0.066 |
| 6.2   | 2.95           | 1.15           | 0.00824    | 0.042 |
| 6.4   | 2.92           | 1.17           | 0.00701    | 0.040 |
| 6.6   | 2.90           | 1.20           | 0.00598    | 0.039 |
| 6.8   | 2.87           | 1.22           | 0.00515    | 0.039 |
| 7.0   | 2.85           | 1.25           | 0.00446    | 0.038 |
| 7.2   | 2.83           | 1.27           | 0.00388    | 0.037 |
| 7.4   | 2.81           | 1.29           | 0.00341    | 0.036 |
| 7.6   | 2.76           | 1.34           | 0.00300    | 0.052 |
| 7.8   | 2.74           | 1.36           | 0.002657   | 0.051 |
| 8.0   | 2.72           | 1.38           | 0.002360   | 0.051 |
| 8.2   | 2.70           | 1.39           | 0.002101   | 0.050 |
| 8.4   | 2.69           | 1.40           | 0.001881   | 0.048 |
| 8.6   | 2.68           | 1.42           | 0.001688   | 0.047 |
| 8.8   | 2.66           | 1.43           | 0.001520   | 0.046 |
| 9.0   | 2.65           | 1.45           | 0.001374   | 0.046 |
| 9.2   | 2.64           | 1.46           | 0.001249   | 0.043 |
| 9.4   | 2.63           | 1.47           | 0.001131   | 0.044 |
| 9.6   | 2.62           | 1.48           | 0.001032   | 0.042 |
| 9.8   | 2.61           | 1.49           | 0.000944   | 0.042 |
| 10.0  | 2.60           | 1.50           | 0.000865   | 0.038 |
| 10.2  | 2.59           | 1.51           | 0.00079506 | 0.038 |
| 10.4  | 2.58           | 1.52           | 0.000731   | 0.038 |
| 10.6  | 2.57           | 1.53           | 0.000676   | 0.037 |
| 10.8  | 2.56           | 1.54           | 0.000622   | 0.035 |
| 11.0  | 2.55           | 1.55           | 0.0005773  | 0.034 |
| 11.2  | 2.54           | 1.55           | 0.000537   | 0.032 |
| 11.4  | 2.54           | 1.56           | 0.000499   | 0.030 |
| 11.6  | 2.54           | 1.56           | 0.000465   | 0.019 |
| 11.8  | 2.52           | 1.58           | 0.000434   | 0.028 |
| 12.0  | 2.50           | 1.58           | 0.000396   | 0.030 |
| 12.2  | 2.50           | 1.59           | 0.0003715  | 0.029 |
| 12.4  | 2.50           | 1.60           | 0.000349   | 0.022 |
| 12.6  | 2.49           | 1.60           | 0.0003270  | 0.025 |
| 12.8  | 2.49           | 1.61           | 0.0003067  | 0.025 |
| 13.0  | 2.48           | 1.62           | 0.000288   | 0.025 |
| 13.2  | 2.48           | 1.62           | 0.0002697  | 0.026 |
| 13.4  | 2.47           | 1.63           | 0.0002553  | 0.022 |
| 13.6  | 2.46           | 1.63           | 0.0002408  | 0.022 |

|      |      |      |                      |        |
|------|------|------|----------------------|--------|
| 13.8 | 2.46 | 1.64 | 0.0002284            | 0.0187 |
| 14.0 | 2.45 | 1.64 | 0.00021390           | 0.022  |
| 14.2 | 2.45 | 1.65 | 0.0002019            | 0.017  |
| 14.4 | 2.44 | 1.66 | 0.0001896            | 0.018  |
| 14.6 | 2.44 | 1.66 | 0.00017956           | 0.013  |
| 14.8 | 2.43 | 1.66 | 0.0001683            | 0.017  |
| 15.0 | 2.43 | 1.67 | 0.0001583            | 0.019  |
| 15.2 | 2.42 | 1.67 | 0.0001513            | 0.011  |
| 15.4 | 2.42 | 1.68 | 0.0001416            | 0.014  |
| 15.6 | 2.41 | 1.68 | 0.0001334            | 0.013  |
| 15.8 | 2.41 | 1.68 | 0.0001241            | 0.015  |
| 16.0 | 2.40 | 1.69 | 0.0001198            | 0.009  |
| 16.2 | 2.40 | 1.70 | 0.0001110            | 0.012  |
| 16.4 | 2.40 | 1.70 | 0.0001051            | 0.011  |
| 16.6 | 2.39 | 1.71 | $9.85 \cdot 10^{-5}$ | 0.015  |
| 16.8 | 2.39 | 1.70 | $9.05 \cdot 10^{-5}$ | 0.011  |
| 17.0 | 2.38 | 1.71 | $8.78 \cdot 10^{-5}$ | 0.007  |

**Figure S7. 1-Y(Dy):** (a)  $\chi_M'' = f(T)$  in zero field (test frequency: 997 Hz,  $H_{AC} = 3$  Oe); (b)  $\tau = f(H)$  at 5 K.

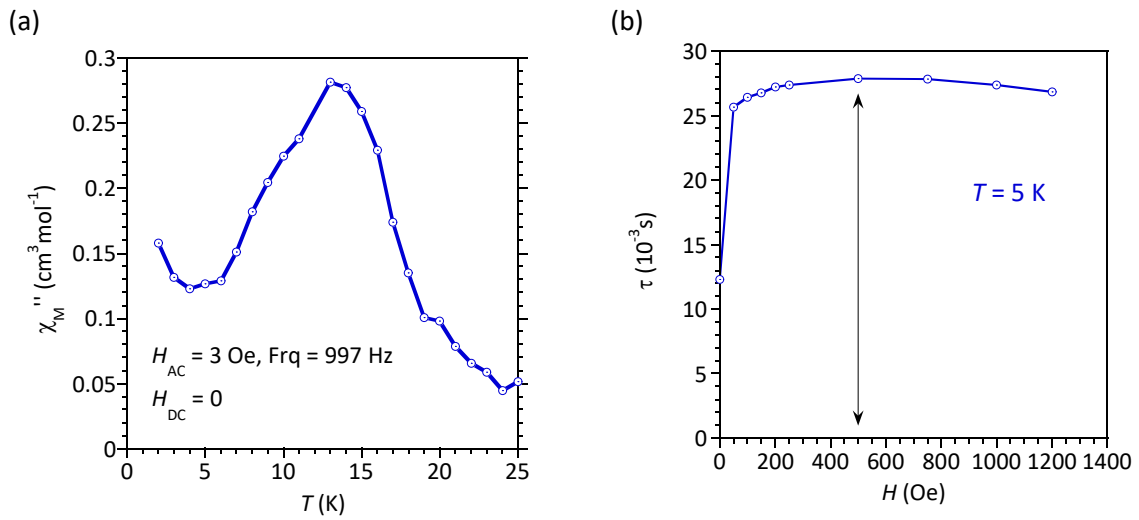

**Figure S8. 1-Y(Dy):** The temperature and frequency dependencies of  $\chi_M'$  and  $\chi_M''$

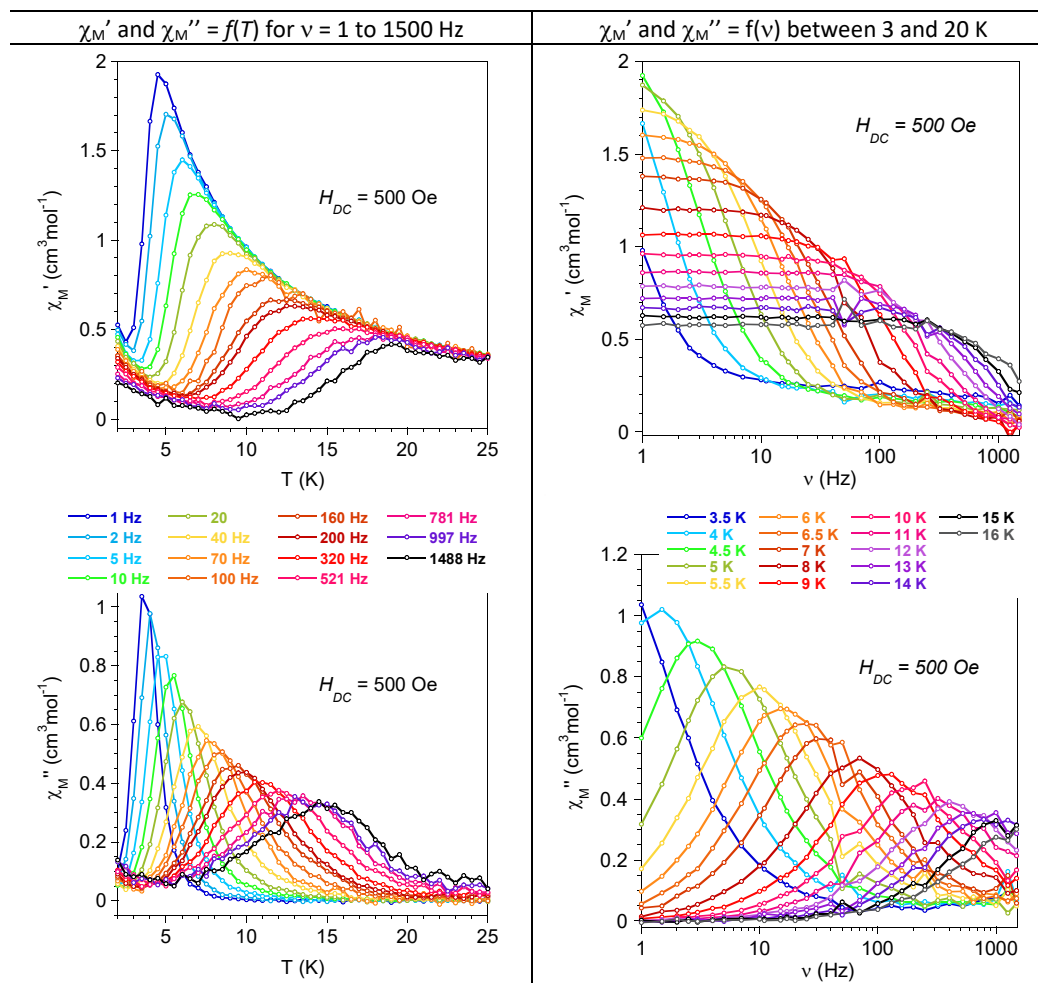

**Figure S9. 1-Y(Dy):** Cole-Cole plots and best-fit parameters.

The relaxation time distribution width given by parameter  $\alpha$  is small suggesting a single or main relaxation process. This is consistent with the observation made for the bulk complex. It can be noticed that from 12 K and above  $\alpha$  become larger which could be related to the noise of the data for larger T due to a weaker signal for  $\chi_M''$ .

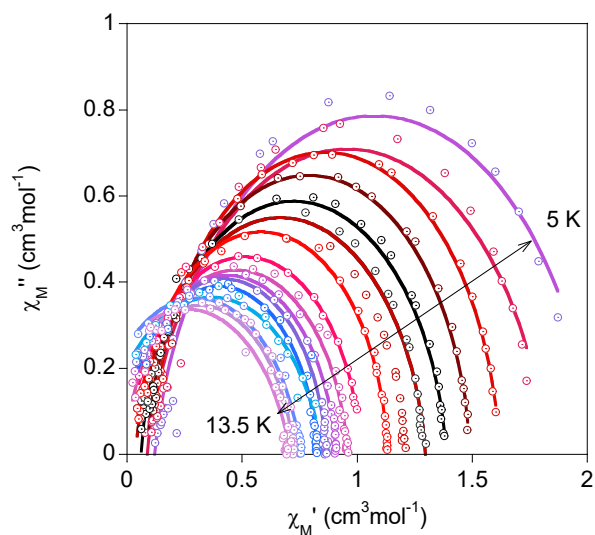

| T (K) | $X_T$    | $X_S$     | alpha    | R <sup>2</sup> |
|-------|----------|-----------|----------|----------------|
| 3.5   | 2.91(9)  | 0.241(2)  | 0.077(9) | 0.999          |
| 4.0   | 2.61(9)  | 0.190(3)  | 0.09(1)  | 0.995          |
| 4.5   | 2.21(2)  | 0.165(3)  | 0.069(8) | 0.995          |
| 5.0   | 1.89(3)  | 0.140(5)  | 0.08(2)  | 0.959          |
| 5.5   | 1.78(1)  | 0.125(5)  | 0.06(1)  | 0.979          |
| 6.0   | 1.620(4) | 0.103(3)  | 0.050(7) | 0.993          |
| 6.5   | 1.492(3) | 0.087(3)  | 0.051(8) | 0.988          |
| 7.0   | 1.389(4) | 0.060(3)  | 0.08(1)  | 0.972          |
| 7.5   | 1.299(3) | 0.036(4)  | 0.09(1)  | 0.968          |
| 8.0   | 1.212(2) | 0.041(5)  | 0.07(1)  | 0.968          |
| 8.5   | 1.132(1) | 0.034(3)  | 0.039(7) | 0.988          |
| 9.5   | 1.019(4) | 0.007(7)  | 0.06(1)  | 0.986          |
| 10    | 0.959(1) | -0.009(8) | 0.08(1)  | 0.971          |
| 10.5  | 0.909(2) | -0.03(1)  | 0.08(2)  | 0.970          |
| 11.0  | 0.866(1) | -0.02(1)  | 0.06(1)  | 0.972          |
| 11.5  | 0.826(1) | -0.02(2)  | 0.05(2)  | 0.955          |
| 12.0  | 0.85(1)  | -0.11(3)  | 0.17(4)  | 0.925          |
| 12.5  | 0.755(2) | -0.15(3)  | 0.14(2)  | 0.976          |
| 13.0  | 0.725(2) | -0.09(3)  | 0.11(2)  | 0.967          |
| 13.5  | 0.709(5) | -0.19(8)  | 0.19(6)  | 0.885          |

**Table S4. 1-Y(Dy):** best-fit parameters for the analysis of  $\chi_M'' = f(\text{freq})$  by the extended Debye model

| <b>T (K)</b> | <b>X<sub>T</sub></b> | <b>X<sub>S</sub></b> | <b>Tau (s)</b> | <b>alpha</b> | <b>R<sup>2</sup></b> |
|--------------|----------------------|----------------------|----------------|--------------|----------------------|
| 4.0          | 3.69                 | 1.30                 | 0.12(1)        | 0.10(3)      | 0.984                |
| 4.5          | 3.52                 | 1.48                 | 0.053(2)       | 0.07(2)      | 0.990                |
| 5.0          | 3.40                 | 1.60                 | 0.0285(7)      | 0.05(2)      | 0.988                |
| 5.5          | 3.33                 | 1.67                 | 0.0165(5)      | 0.06(2)      | 0.979                |
| 6.0          | 3.26                 | 1.73                 | 0.0102(2)      | 0.06(2)      | 0.983                |
| 6.5          | 3.23                 | 1.77                 | 0.0637(2)      | 0.07(1)      | 0.995                |
| 7.0          | 3.15                 | 1.84                 | 0.0046(2)      | 0.08(2)      | 0.970                |
| 7.5          | 3.13                 | 1.87                 | 0.003208(6)    | 0.07(1)      | 0.985                |
| 8.0          | 3.09                 | 1.91                 | 0.00231(5)     | 0.08(1)      | 0.988                |
| 8.5          | 3.07                 | 1.93                 | 0.00167(4)     | 0.07(1)      | 0.989                |
| 9.0          | 3.04                 | 1.96                 | 0.00129(2)     | 0.07(1)      | 0.993                |
| 9.5          | 3.01                 | 1.99                 | 0.00102(2)     | 0.066(9)     | 0.995                |
| 10           | 2.97                 | 2.02                 | 0.00082(2)     | 0.05(1)      | 0.994                |
| 10.5         | 2.95                 | 2.05                 | 0.00060(3)     | 0.04(3)      | 0.957                |
| 11.0         | 2.95                 | 2.05                 | 0.00052(1)     | 0.07(1)      | 0.992                |
| 11.5         | 2.93                 | 2.07                 | 0.000448(8)    | 0.063(1)     | 0.995                |
| 12.0         | 2.91                 | 2.08                 | 0.000359(5)    | 0.049(8)     | 0.998                |
| 12.5         | 2.91                 | 2.09                 | 0.000295(3)    | 0.06(1)      | 0.995                |
| 13.0         | 2.89                 | 2.11                 | 0.000245(1)    | 0.05(1)      | 0.996                |
| 13.5         | 2.87                 | 2.13                 | 0.000226(4)    | 0.02(1)      | 0.997                |
| 14.0         | 2.87                 | 2.13                 | 0.000183(2)    | 0.051(9)     | 0.997                |
| 14.5         | 2.85                 | 2.15                 | 0.000165(9)    | 0.04(3)      | 0.992                |
| 15.0         | 2.83                 | 2.17                 | 0.000139(8)    | 0.0016(25)   | 0.993                |
| 15.5         | 2.86                 | 2.14                 | 0.000111(7)    | 0.07(2)      | 0.996                |
| 16.0         | 2.81                 | 2.19                 | 0.000103(5)    | 0.03(1)      | 0.998                |
| 16.5         | 2.83                 | 2.17                 | 0.00008(2)     | 0.05(6)      | 0.973                |

**Supporting information corresponding to the Computational section**

**Table S5.** Average axial and equatorial bond lengths of the hydrogen-optimised structures of complexes **1-Dy** to **4-Dy**.

|      | Avg. axial bond lengths | Avg. equatorial bond lengths | Avg. axial/Avg. equatorial |
|------|-------------------------|------------------------------|----------------------------|
| 1-Dy | 2.231                   | 2.384                        | 0.936                      |
| 2-Dy | 2.644                   | 2.373                        | 1.114                      |
| 3-Dy | 2.431                   | 2.381                        | 1.021                      |
| 4-Dy | 2.449                   | 2.389                        | 1.025                      |

**Table S6.** CASSCF computed average Mulliken charges on axial and equatorial ligand with the ratio of Avg. axial/Av. equatorial for complexes **1-Dy** to **4-Dy**.

|      | Avg. axial charges | Avg. equatorial charges | Avg. axial/Avg. equatorial |
|------|--------------------|-------------------------|----------------------------|
| 1-Dy | -0.68              | -0.46                   | 1.49                       |
| 2-Dy | -0.64              | -0.40                   | 1.60                       |
| 3-Dy | -0.65              | -0.43                   | 1.51                       |
| 4-Dy | -0.65              | -0.44                   | 1.48                       |

**Table S7.** SA-CASSCF computed g-tensors, and the angle of deviation from ground state  $g_{zz}$  orientation.

**1-Dy (CASSCF)**

| KD | Energy( $\text{cm}^{-1}$ ) | $g_{xx}$ | $g_{yy}$ | $g_{zz}$ | angle( $\theta$ ) |
|----|----------------------------|----------|----------|----------|-------------------|
| 1  | 0.00                       | 0.0188   | 0.0458   | 19.6246  | 0.0               |
| 2  | 198.68                     | 0.8490   | 1.9219   | 13.8939  | 84.5              |
| 3  | 223.33                     | 0.1202   | 1.6347   | 17.1980  | 85.6              |
| 4  | 280.74                     | 0.2725   | 1.9874   | 10.9564  | 98.4              |
| 5  | 411.46                     | 2.1261   | 3.6089   | 14.3862  | 91.6              |
| 6  | 472.47                     | 0.9187   | 4.5448   | 11.9883  | 100.6             |
| 7  | 583.01                     | 1.8480   | 3.3185   | 12.8051  | 139.3             |
| 8  | 746.22                     | 0.2213   | 0.6051   | 17.8228  | 108.6             |

**1-Dy (NEVPT2)**

| KD | Energy( $\text{cm}^{-1}$ ) | $g_{xx}$ | $g_{yy}$ | $g_{zz}$ | angle( $\theta$ ) |
|----|----------------------------|----------|----------|----------|-------------------|
| 1  | 0.00                       | 0.0088   | 0.0230   | 19.6418  | 0.0               |
| 2  | 194.87                     | 0.4955   | 0.9394   | 15.7256  | 70.1              |
| 3  | 244.14                     | 0.0014   | 4.7147   | 13.9352  | 94.9              |
| 4  | 284.71                     | 1.1646   | 1.8235   | 9.4301   | 98.3              |

|   |        |        |        |         |       |
|---|--------|--------|--------|---------|-------|
| 5 | 416.31 | 2.0522 | 3.0489 | 14.7338 | 94.7  |
| 6 | 494.48 | 0.9301 | 5.2964 | 11.1302 | 96.5  |
| 7 | 605.30 | 1.7104 | 3.7895 | 12.5347 | 138.9 |
| 8 | 801.31 | 0.1174 | 0.3961 | 17.9771 | 115.1 |

## 2-Dy

| KD | Energy(cm <sup>-1</sup> ) | g <sub>xx</sub> | g <sub>yy</sub> | g <sub>zz</sub> | angle(θ) |
|----|---------------------------|-----------------|-----------------|-----------------|----------|
| 1  | 0.00                      | 0.0031          | 0.0078          | 19.6887         | 0.0      |
| 2  | 148.90                    | 0.3756          | 0.8604          | 14.1140         | 15.0     |
| 3  | 192.83                    | 0.2222          | 0.4478          | 12.1927         | 18.8     |
| 4  | 300.67                    | 1.8118          | 2.8095          | 15.3869         | 97.0     |
| 5  | 361.33                    | 0.1799          | 5.1511          | 10.4599         | 90.6     |
| 6  | 450.07                    | 2.2929          | 7.8667          | 9.4345          | 89.9     |
| 7  | 513.02                    | 2.7867          | 3.4535          | 10.6635         | 10.1     |
| 8  | 624.07                    | 0.2280          | 0.6332          | 16.8148         | 81.9     |

## 3-Dy

| KD | Energy(cm <sup>-1</sup> ) | g <sub>xx</sub> | g <sub>yy</sub> | g <sub>zz</sub> | angle(θ) |
|----|---------------------------|-----------------|-----------------|-----------------|----------|
| 1  | 0.00                      | 0.0149          | 0.0301          | 19.6617         | 0.0      |
| 2  | 178.97                    | 0.6810          | 1.4904          | 14.4313         | 13.0     |
| 3  | 233.56                    | 0.9231          | 2.2326          | 11.5176         | 90.9     |
| 4  | 277.55                    | 0.0523          | 1.3998          | 14.8883         | 90.2     |
| 5  | 397.43                    | 1.0544          | 3.9352          | 12.2836         | 97.0     |
| 6  | 459.37                    | 2.6627          | 6.2009          | 12.8846         | 95.5     |
| 7  | 544.24                    | 0.4176          | 1.2192          | 12.7401         | 109.2    |
| 8  | 688.73                    | 0.1467          | 0.7009          | 17.4863         | 94.3     |

## 4-Dy

| KD | Energy(cm <sup>-1</sup> ) | g <sub>xx</sub> | g <sub>yy</sub> | g <sub>zz</sub> | angle(θ) |
|----|---------------------------|-----------------|-----------------|-----------------|----------|
| 1  | 0.00                      | 0.0187          | 0.0366          | 19.6582         | 0.0      |
| 2  | 176.84                    | 0.7561          | 1.9505          | 14.2340         | 5.9      |
| 3  | 233.84                    | 0.4796          | 1.1534          | 12.0909         | 21.5     |
| 4  | 309.02                    | 1.0782          | 1.1817          | 17.2299         | 90.9     |
| 5  | 392.36                    | 1.2285          | 3.9939          | 12.5905         | 85.6     |
| 6  | 469.32                    | 2.1355          | 6.6849          | 11.3244         | 88.5     |
| 7  | 552.22                    | 1.2110          | 2.3757          | 12.2015         | 38.3     |
| 8  | 682.11                    | 0.1316          | 0.8064          | 17.2490         | 78.9     |



## 5-Dy

| KD | Energy(cm <sup>-1</sup> ) | g <sub>xx</sub> | g <sub>yy</sub> | g <sub>zz</sub> | angle(θ) |
|----|---------------------------|-----------------|-----------------|-----------------|----------|
| 1  | 0.00                      | 0.0060          | 0.0113          | 19.7253         | 0.0      |
| 2  | 170.90                    | 0.4082          | 0.9808          | 14.6569         | 9.4      |
| 3  | 222.56                    | 0.3105          | 0.5120          | 12.5881         | 7.7      |
| 4  | 324.72                    | 1.6795          | 2.4429          | 15.6241         | 84.5     |
| 5  | 385.35                    | 0.1892          | 5.2974          | 10.7733         | 78.5     |
| 6  | 472.26                    | 2.7109          | 8.4297          | 9.4364          | 77.8     |
| 7  | 544.73                    | 1.6203          | 2.3779          | 11.8237         | 9.9      |
| 8  | 675.37                    | 0.0987          | 0.4886          | 17.2425         | 85.9     |

**Table S8.** SINGLE\_ANISO computed crystal field parameters for **1-Dy**, **2-Dy**, **3-Dy**, **4-Dy**.

$$H_{CF} = \sum_{k=-q}^q B_k^q O_k^q \quad \text{and}$$

The CF parameters were computed using the following equation,

here  $B_k^q$  and  $O_k^q$  are the crystal field parameters and Steven's operator, respectively.

| k | q  | $B_k^q$          | $B_k^q$          | $B_k^q$          | $B_k^q$          |
|---|----|------------------|------------------|------------------|------------------|
|   |    | 1-Dy             | 2-Dy             | 3-Dy             | 4-Dy             |
| 2 | -2 | -5.24E-01        | 3.88E-01         | 1.62E-01         | 9.19E-02         |
|   | -1 | <b>-3.44E+00</b> | -7.46E-06        | <b>-4.87E+00</b> | 7.85E-01         |
|   | 0  | <b>-4.04E+00</b> | <b>-5.80E+00</b> | <b>-2.03E+00</b> | <b>-6.18E+00</b> |
|   | 1  | -6.62E-01        | -4.75E-06        | 2.02E+00         | <b>-1.99E+00</b> |
|   | 2  | -6.03E-01        | <b>-1.15E+00</b> | <b>-1.31E+00</b> | 8.15E-03         |
| 4 | -4 | 4.27E-03         | 9.43E-02         | 8.58E-03         | <b>2.21E-01</b>  |
|   | -3 | -3.50E-02        | -7.61E-07        | <b>4.64E-02</b>  | 1.66E-02         |
|   | -2 | -2.83E-03        | 7.58E-02         | -4.67E-03        | <b>-2.47E-01</b> |
|   | -1 | <b>5.03E-02</b>  | -2.14E-07        | <b>1.96E-02</b>  | 4.31E-03         |
|   | 0  | 1.80E-03         | -8.81E-03        | <b>-1.37E-02</b> | -1.11E-02        |
|   | 1  | -1.78E-03        | -1.10E-07        | -8.59E-03        | 1.29E-02         |
|   | 2  | 3.69E-02         | <b>-2.82E-01</b> | 4.90E-03         | <b>1.82E-01</b>  |
|   | 3  | 3.10E-03         | 6.77E-08         | <b>-1.44E-02</b> | 1.49E-02         |
| 6 | -6 | 1.50E-05         | -1.11E-03        | -3.30E-05        | 2.53E-04         |
|   | -5 | <b>-3.04E-04</b> | 2.17E-08         | <b>-2.67E-04</b> | <b>-1.18E-03</b> |
|   | -4 | 2.30E-05         | -3.38E-04        | -3.67E-05        | 6.82E-04         |
|   | -3 | <b>1.59E-04</b>  | 3.10E-08         | <b>3.33E-04</b>  | 7.99E-04         |
|   | -2 | 3.27E-05         | -2.99E-03        | 3.10E-05         | <b>7.41E-03</b>  |
|   | -1 | <b>-6.87E-04</b> | 2.14E-09         | <b>3.58E-04</b>  | <b>-1.44E-03</b> |
|   | 0  | -1.69E-05        | -1.24E-03        | 2.03E-05         | <b>-1.32E-03</b> |
|   | 1  | 8.72E-05         | 3.84E-08         | <b>-1.69E-04</b> | -2.21E-04        |
|   | 2  | <b>-2.25E-04</b> | <b>1.05E-02</b>  | <b>-2.61E-04</b> | <b>-6.97E-03</b> |

|  |   |                  |           |           |                  |
|--|---|------------------|-----------|-----------|------------------|
|  | 3 | <b>-1.20E-04</b> | -1.05E-08 | -3.77E-05 | <b>-1.25E-03</b> |
|  | 4 | <b>-1.53E-04</b> | 5.91E-04  | 6.17E-05  | -3.92E-04        |
|  | 5 | 8.65E-06         | 2.87E-08  | 1.71E-05  | <b>-1.40E-03</b> |
|  | 6 | 3.22E-05         | 1.06E-03  | 5.88E-06  | <b>-1.01E-03</b> |

**Table S9.** SINGLE\_ANISO computed wave function decomposition analysis for the Dy(III) centre. The major dominating values are kept in bold.

| $\pm mJ$ | <i>wave function decomposition analysis 1-Dy</i>                                                                |
|----------|-----------------------------------------------------------------------------------------------------------------|
| KD1      | <b>96.5 %</b> $ \pm 15/2\rangle$                                                                                |
| KD2      | <b>49.1 %</b> $ \pm 13/2\rangle$ + 27.2% $ \pm 9/2\rangle$ + 11.9% $ \pm 5/2\rangle$                            |
| KD3      | <b>25.1 %</b> $ \pm 1/2\rangle$ + 20.8 % $ \pm 3/2\rangle$ + 19.6 % $ \pm 7/2\rangle$                           |
| KD4      | <b>44.6 %</b> $ \pm 11/2\rangle$ + 27.3% $ \pm 7/2\rangle$ + 9.0% $ \pm 3/2\rangle$                             |
| KD5      | <b>37.6 %</b> $ \pm 9/2\rangle$ + 30.8% $ \pm 13/2\rangle$ + 10.9% $ \pm 7/2\rangle$ + 10.8% $ \pm 11/2\rangle$ |
| KD6      | <b>22.9 %</b> $ \pm 5/2\rangle$ + 22.9% $ \pm 11/2\rangle$ + 20.9% $ \pm 7/2\rangle$ + 16.2% $ \pm 9/2\rangle$  |
| KD7      | <b>32.9 %</b> $ \pm 3/2\rangle$ + 27.7% $ \pm 5/2\rangle$ + 15.6% $ \pm 7/2\rangle$ + 12.2% $ \pm 11/2\rangle$  |
| KD8      | <b>59.7 %</b> $ \pm 1/2\rangle$ + 27.7% $ \pm 3/2\rangle$                                                       |

| $\pm mJ$ | <i>wave function decomposition analysis 2-Dy</i>                                     |
|----------|--------------------------------------------------------------------------------------|
| KD1      | <b>97.2 %</b> $ \pm 15/2\rangle$                                                     |
| KD2      | <b>51.3 %</b> $ \pm 13/2\rangle$ + 39.2% $ \pm 9/2\rangle$                           |
| KD3      | <b>52.2 %</b> $ \pm 11/2\rangle$ + 43.7% $ \pm 7/2\rangle$                           |
| KD4      | <b>39.8 %</b> $ \pm 5/2\rangle$ + 28.4% $ \pm 3/2\rangle$ + 18.8% $ \pm 1/2\rangle$  |
| KD5      | <b>36.4 %</b> $ \pm 9/2\rangle$ + 36.1% $ \pm 13/2\rangle$ + 12.1% $ \pm 1/2\rangle$ |
| KD6      | <b>46.5 %</b> $ \pm 7/2\rangle$ + 41.4% $ \pm 11/2\rangle$                           |
| KD7      | <b>42.3 %</b> $ \pm 5/2\rangle$ + 33.5% $ \pm 3/2\rangle$ + 17.6% $ \pm 9/2\rangle$  |
| KD8      | <b>65.4 %</b> $ \pm 1/2\rangle$ + 25.7% $ \pm 3/2\rangle$                            |

| $\pm mJ$ | <i>wave function decomposition analysis 3-Dy</i>                                     |
|----------|--------------------------------------------------------------------------------------|
| KD1      | <b>96.8 %</b> $ \pm 15/2\rangle$                                                     |
| KD2      | <b>53.1 %</b> $ \pm 13/2\rangle$ + 35.5% $ \pm 9/2\rangle$                           |
| KD3      | <b>46.4 %</b> $ \pm 7/2\rangle$ + 43.1% $ \pm 7/2\rangle$                            |
| KD4      | <b>32.6 %</b> $ \pm 3/2\rangle$ + 28.4% $ \pm 5/2\rangle$ + 23.8% $ \pm 1/2\rangle$  |
| KD5      | <b>41.8 %</b> $ \pm 9/2\rangle$ + 40.8% $ \pm 13/2\rangle$ + 9.7% $ \pm 5/2\rangle$  |
| KD6      | <b>39.4 %</b> $ \pm 7/2\rangle$ + 33.4% $ \pm 11/2\rangle$ + 14.8% $ \pm 5/2\rangle$ |
| KD7      | <b>38.4 %</b> $ \pm 3/2\rangle$ + 35.1 % $ \pm 5/2\rangle$                           |
| KD8      | <b>65.3 %</b> $ \pm 1/2\rangle$ + 26.5% $ \pm 3/2\rangle$                            |

| $\pm mJ$ | <i>wave function decomposition analysis 4-Dy</i> |
|----------|--------------------------------------------------|
|----------|--------------------------------------------------|

|     |                                                                                      |
|-----|--------------------------------------------------------------------------------------|
| KD1 | <b>96.8 %</b> $ \pm 15/2\rangle$                                                     |
| KD2 | <b>54.5 %</b> $ \pm 13/2\rangle$ + 35.7% $ \pm 9/2\rangle$                           |
| KD3 | <b>50.6 %</b> $ \pm 11/2\rangle$ + 43.1% $ \pm 7/2\rangle$                           |
| KD4 | <b>32.6 %</b> $ \pm 3/2\rangle$ + 32.5% $ \pm 5/2\rangle$ + 24.4% $ \pm 1/2\rangle$  |
| KD5 | <b>41.6 %</b> $ \pm 9/2\rangle$ + 38.2% $ \pm 13/2\rangle$                           |
| KD6 | <b>38.4 %</b> $ \pm 7/2\rangle$ + 32.0% $ \pm 11/2\rangle$ + 13.9% $ \pm 5/2\rangle$ |
| KD7 | <b>37.8 %</b> $ \pm 3/2\rangle$ + 35.8 % $ \pm 5/2\rangle$                           |
| KD8 | <b>65.5 %</b> $ \pm 1/2\rangle$ + 25.7% $ \pm 3/2\rangle$                            |

**$\pm mJ$  wave function decomposition analysis 5-Dy**

|     |                                                                                      |
|-----|--------------------------------------------------------------------------------------|
| KD1 | <b>99.9 %</b> $ \pm 15/2\rangle$                                                     |
| KD2 | <b>99.0 %</b> $ \pm 13/2\rangle$                                                     |
| KD3 | <b>78.0 %</b> $ \pm 11/2\rangle$ + 15.6% $ \pm 7/2\rangle$                           |
| KD4 | <b>36.6 %</b> $ \pm 3/2\rangle$ + 30.1% $ \pm 1/2\rangle$ + 15.4% $ \pm 11/2\rangle$ |
| KD5 | <b>35.9 %</b> $ \pm 9/2\rangle$ + 33.7% $ \pm 1/2\rangle$ + 12.6% $ \pm 7/2\rangle$  |
| KD6 | <b>43.8 %</b> $ \pm 5/2\rangle$ + 33.1% $ \pm 3/2\rangle$ + 16.8% $ \pm 9/2\rangle$  |
| KD7 | <b>49.9 %</b> $ \pm 7/2\rangle$ + 30.2 % $ \pm 9/2\rangle$ + 13.2% $ \pm 5/2\rangle$ |
| KD8 | <b>26.9 %</b> $ \pm 5/2\rangle$ + 17.4% $ \pm 3/2\rangle$ + 12.2% $ \pm 1/2\rangle$  |

**Table S10.** CASSCF/NEVPT2 computed low-lying 21 sextets (in red) and 224 quartet states (in black) along with spin-orbit coupled states (in blue, Kramer doublets). All the values are reported here in  $\text{cm}^{-1}$ .

| 1-Dy   |         |         |         |         |         |          |
|--------|---------|---------|---------|---------|---------|----------|
| CASSCF |         |         |         |         |         |          |
| 0.0    | 24117.3 | 25907.1 | 33920.0 | 56677.6 | 76469.3 | 105351.6 |
| 11.2   | 24124.3 | 25967.1 | 33949.3 | 56688.8 | 76508.1 | 105407.0 |
| 92.9   | 24156.8 | 26024.8 | 33984.3 | 56749.9 | 76517.7 | 105508.6 |
| 252.8  | 24200.8 | 26117.1 | 34040.0 | 56808.9 | 76561.6 | 105543.4 |
| 305.0  | 24216.4 | 29061.5 | 34123.9 | 56826.7 | 76571.5 |          |
| 346.9  | 24238.0 | 29063.2 | 34140.2 | 56850.2 | 76591.9 |          |
| 415.3  | 24269.4 | 29123.4 | 34147.4 | 56878.1 | 76594.1 |          |
| 464.7  | 24284.9 | 29142.5 | 34166.5 | 57012.4 | 77830.2 |          |
| 698.2  | 24363.0 | 29154.4 | 36907.4 | 57045.9 | 77856.0 |          |
| 904.0  | 24475.8 | 29161.7 | 36921.1 | 57060.2 | 77879.0 |          |
| 927.5  | 24503.8 | 29270.6 | 37046.8 | 57104.1 | 78044.0 |          |
| 7490.9 | 24525.3 | 29272.6 | 37061.2 | 57117.5 | 78168.0 |          |
| 7589.1 | 24541.2 | 29322.2 | 37164.3 | 57127.3 | 78235.1 |          |
| 7703.0 | 24587.0 | 29338.4 | 37194.1 | 57137.9 | 78277.2 |          |
| 7790.1 | 24604.7 | 29342.0 | 37296.8 | 57185.8 | 84467.2 |          |
| 7830.9 | 24616.6 | 29355.3 | 37357.8 | 57191.4 | 84530.0 |          |
| 7898.0 | 24670.9 | 29362.5 | 37431.0 | 61478.4 | 84662.7 |          |
| 8013.9 | 24682.6 | 29435.2 | 37474.2 | 61479.1 | 84954.4 |          |

|         |         |         |         |         |          |  |
|---------|---------|---------|---------|---------|----------|--|
| 34270.1 | 24705.3 | 29436.4 | 37500.2 | 61534.2 | 84967.3  |  |
| 34702.6 | 24707.0 | 30468.7 | 37586.8 | 61545.4 | 87225.7  |  |
| 34864.7 | 24719.1 | 30481.1 | 42560.5 | 61590.2 | 87247.8  |  |
|         | 24730.1 | 30483.3 | 42831.8 | 61606.6 | 87330.3  |  |
|         | 24763.4 | 30496.0 | 42953.1 | 61628.3 | 87357.8  |  |
|         | 24788.2 | 30514.8 | 43107.3 | 61702.5 | 87373.1  |  |
|         | 24807.5 | 30534.3 | 43156.3 | 61711.9 | 87392.8  |  |
|         | 24875.7 | 30543.6 | 43222.5 | 61858.1 | 87429.1  |  |
|         | 24881.8 | 30565.5 | 43323.9 | 61862.1 | 87675.3  |  |
|         | 24908.2 | 30607.8 | 44310.0 | 61953.7 | 87681.2  |  |
|         | 24978.1 | 30622.2 | 44314.6 | 61954.7 | 87857.0  |  |
|         | 25019.9 | 30636.7 | 44385.0 | 62069.3 | 87859.3  |  |
|         | 25048.8 | 30730.6 | 44390.4 | 62070.3 | 87988.0  |  |
|         | 25057.7 | 30745.1 | 44466.7 | 66592.6 | 87993.3  |  |
|         | 25072.0 | 30747.3 | 44483.6 | 66733.6 | 97736.6  |  |
|         | 25080.4 | 30748.6 | 44534.0 | 67138.0 | 97909.0  |  |
|         | 25122.5 | 30751.0 | 44546.2 | 72284.2 | 98011.1  |  |
|         | 25186.0 | 30760.7 | 44592.2 | 72335.3 | 98085.2  |  |
|         | 25193.3 | 32324.5 | 44706.5 | 72682.9 | 98340.7  |  |
|         | 25262.8 | 32387.3 | 44728.2 | 72757.0 | 98481.4  |  |
|         | 25264.3 | 32550.3 | 44860.9 | 72845.1 | 98501.0  |  |
|         | 25751.6 | 32587.3 | 44865.8 | 76162.5 | 105074.0 |  |
|         | 25765.3 | 32624.3 | 56609.7 | 76439.3 | 105114.2 |  |
|         | 25844.9 | 33860.4 | 56634.7 | 76448.8 | 105154.6 |  |
|         | 25876.0 | 33874.0 | 56649.0 | 76460.5 | 105162.4 |  |
|         | 25897.6 | 33911.1 | 56669.6 | 76466.4 | 105251.8 |  |

|         |          |          |          |          |
|---------|----------|----------|----------|----------|
| 0.00    | 14087.45 | 28814.71 | 33955.53 | 37655.93 |
| 198.68  | 14881.19 | 28836.50 | 33967.27 | 37680.28 |
| 223.33  | 14901.52 | 28865.42 | 33992.04 | 38002.02 |
| 280.74  | 15357.65 | 28897.17 | 34019.16 | 38040.62 |
| 411.46  | 24381.73 | 28966.74 | 34077.88 | 38072.57 |
| 472.46  | 24447.74 | 29357.97 | 34104.92 | 38130.83 |
| 583.01  | 24555.01 | 29371.98 | 34131.79 | 38156.63 |
| 746.22  | 24669.01 | 29410.94 | 34154.14 | 38210.60 |
| 3139.91 | 24891.40 | 29463.21 | 34169.34 | 38232.41 |
| 3200.83 | 26529.92 | 29537.24 | 34185.95 | 38356.16 |
| 3340.54 | 26692.84 | 29561.39 | 34221.08 | 38381.08 |
| 3389.82 | 26737.65 | 29590.03 | 34249.42 | 38419.14 |
| 3452.62 | 26778.55 | 29598.35 | 34294.55 | 38440.94 |
| 3500.96 | 26836.19 | 29616.65 | 34308.20 | 38520.72 |
| 3551.62 | 26887.32 | 30319.78 | 34331.04 | 38680.65 |
| 5413.18 | 26909.06 | 30412.51 | 34344.61 | 38741.20 |
| 5449.53 | 26956.81 | 30487.82 | 34359.89 | 38773.07 |
| 5561.10 | 27096.74 | 30547.70 | 34373.91 | 38877.46 |
| 5644.25 | 27136.32 | 30590.89 | 35344.00 | 38892.92 |
| 5705.84 | 27180.44 | 30626.79 | 35361.21 | 38914.62 |
| 5738.75 | 27198.35 | 31509.39 | 35399.47 | 38925.08 |
| 7125.21 | 27244.32 | 31554.52 | 35458.56 | 38947.04 |
| 7187.09 | 27320.87 | 31570.90 | 35508.39 | 38968.80 |

|          |          |          |          |          |
|----------|----------|----------|----------|----------|
| 7303.47  | 27425.17 | 31591.47 | 35576.19 | 39043.18 |
| 7389.93  | 27450.93 | 31625.27 | 35690.05 | 39117.60 |
| 7444.22  | 27465.55 | 31670.55 | 35758.56 | 39603.58 |
| 8479.86  | 27527.79 | 31681.30 | 35799.04 | 39610.28 |
| 8518.77  | 27665.30 | 31722.67 | 35852.75 | 39638.55 |
| 8691.61  | 27744.87 | 31747.88 | 35919.26 | 39659.48 |
| 8779.87  | 27771.00 | 31838.36 | 35944.51 | 39668.35 |
| 9468.76  | 27787.44 | 31879.71 | 36033.04 | 39670.16 |
| 9634.04  | 27834.26 | 31913.76 | 36240.41 | 39737.37 |
| 9645.34  | 27943.29 | 31971.84 | 36283.19 | 39749.94 |
| 9669.08  | 28011.44 | 32001.64 | 36313.25 | 39754.91 |
| 9688.95  | 28246.68 | 32113.64 | 36802.18 | 39772.50 |
| 9765.69  | 28281.90 | 32125.97 | 36945.15 | 39860.27 |
| 9838.70  | 28320.39 | 32174.16 | 36968.20 | 39890.97 |
| 9861.55  | 28397.13 | 32191.21 | 37039.72 | 39923.24 |
| 9886.51  | 28439.10 | 32226.37 | 37357.86 | 39949.62 |
| 11022.64 | 28466.48 | 32252.36 | 37380.69 | 39998.17 |
| 11110.85 | 28478.64 | 32305.13 | 37469.86 | 40429.57 |
| 11131.61 | 28508.67 | 32330.48 | 37478.24 | 40452.16 |
| 11167.70 | 28529.40 | 32341.70 | 37488.65 | 40535.45 |
| 11189.56 | 28587.02 | 32406.40 | 37513.03 | 40577.86 |
| 12650.94 | 28609.94 | 32450.90 | 37532.80 | 40595.16 |
| 12751.85 | 28647.06 | 32806.05 | 37537.56 | 40601.90 |
| 12814.70 | 28699.65 | 32859.74 | 37546.27 | 40621.45 |
| 12840.99 | 28739.89 | 32885.43 | 37556.35 | 40632.23 |
| 13968.96 | 28751.49 | 32963.83 | 37596.74 | 40678.72 |
| 14061.98 | 28801.84 | 33089.64 | 37620.98 | 40695.42 |

|          |          |          |          |          |           |
|----------|----------|----------|----------|----------|-----------|
| 40729.37 | 50210.96 | 63473.69 | 73410.55 | 86080.31 | 104456.70 |
| 40986.67 | 50248.62 | 63480.38 | 74895.56 | 88976.73 | 104543.99 |
| 41001.92 | 50289.01 | 63521.83 | 75123.12 | 89370.23 | 104591.55 |
| 41082.92 | 50372.12 | 63533.17 | 75243.45 | 89440.08 | 110139.03 |
| 41106.58 | 50456.40 | 64130.37 | 75391.90 | 89896.58 | 110302.65 |
| 42210.15 | 50536.29 | 64161.72 | 78248.71 | 90008.96 | 110543.30 |
| 42235.32 | 50600.40 | 64195.78 | 78395.56 | 90089.57 | 110840.71 |
| 42263.11 | 50701.11 | 64218.10 | 78520.19 | 90943.12 | 110919.88 |
| 42326.77 | 50854.75 | 64289.16 | 79183.83 | 91111.29 | 111095.55 |
| 42408.52 | 50882.79 | 64406.67 | 79395.26 | 91228.64 | 111215.58 |
| 42431.90 | 50971.77 | 64445.81 | 80408.11 | 91397.96 | 111246.67 |
| 42537.45 | 50989.96 | 64508.61 | 81667.59 | 91574.75 | 111283.29 |
| 42545.74 | 51036.67 | 64576.94 | 81673.68 | 91660.60 | 111321.42 |
| 42674.09 | 51082.59 | 65680.44 | 81691.28 | 91710.51 | 111371.85 |
| 42692.26 | 51187.87 | 65737.88 | 81711.82 | 91760.76 | 111439.93 |
| 42773.35 | 51246.66 | 65779.91 | 81740.01 | 91851.10 | 111485.61 |
| 42826.92 | 51417.28 | 65833.24 | 81766.21 | 92002.37 | 111539.90 |
| 43389.98 | 51436.78 | 65870.37 | 81781.06 | 92227.67 | 111580.68 |
| 43521.89 | 51526.38 | 65966.73 | 81794.45 | 92332.09 | 111633.15 |
| 43578.54 | 51657.69 | 66058.88 | 81802.52 | 93015.60 | 111747.36 |

|          |          |          |          |           |           |
|----------|----------|----------|----------|-----------|-----------|
| 43628.35 | 51778.68 | 66173.78 | 81815.78 | 93082.49  | 111904.35 |
| 44701.32 | 60361.72 | 66268.65 | 81827.00 | 93150.49  |           |
| 44755.41 | 60425.14 | 66666.94 | 81850.13 | 93243.69  |           |
| 44783.42 | 60468.54 | 66714.62 | 81866.08 | 93326.01  |           |
| 45576.69 | 60502.47 | 66771.21 | 81887.50 | 93501.44  |           |
| 45650.20 | 60541.60 | 66810.85 | 81912.23 | 93626.00  |           |
| 46130.31 | 60565.64 | 66891.82 | 81922.36 | 93948.44  |           |
| 46162.42 | 60698.13 | 66972.84 | 81932.59 | 94030.26  |           |
| 47059.10 | 60791.71 | 67061.36 | 81976.83 | 94114.77  |           |
| 47085.16 | 60812.47 | 67165.90 | 81987.60 | 94227.30  |           |
| 47110.21 | 60856.06 | 67565.32 | 81997.61 | 94366.06  |           |
| 47591.52 | 60915.99 | 67614.65 | 82008.13 | 94508.53  |           |
| 47768.38 | 60956.30 | 67670.44 | 82028.69 | 94526.13  |           |
| 47891.57 | 61008.13 | 67743.29 | 82462.25 | 94578.63  |           |
| 48693.08 | 61036.95 | 67845.03 | 82531.91 | 94802.85  |           |
| 48789.47 | 61109.26 | 67914.85 | 82640.10 | 94937.97  |           |
| 48837.11 | 61174.33 | 68030.39 | 82701.50 | 95090.49  |           |
| 48856.35 | 61318.81 | 68353.41 | 82728.06 | 101856.34 |           |
| 48904.39 | 61388.32 | 68400.18 | 83227.88 | 102143.90 |           |
| 48936.70 | 61552.00 | 68487.27 | 83313.31 | 102668.45 |           |
| 48957.75 | 61658.19 | 68648.85 | 84957.52 | 102820.14 |           |
| 48977.81 | 61688.93 | 68706.87 | 85115.14 | 102891.74 |           |
| 49004.14 | 61809.06 | 68842.23 | 85202.21 | 103523.33 |           |
| 49071.55 | 63130.89 | 69541.78 | 85268.92 | 103595.23 |           |
| 49172.13 | 63365.78 | 69650.85 | 85713.68 | 103643.93 |           |
| 49289.40 | 63396.33 | 69816.87 | 85849.46 | 103797.87 |           |
| 50130.59 | 63439.46 | 70524.15 | 85937.51 | 104274.25 |           |
| 50155.10 | 63450.12 | 70816.59 | 86053.12 | 104335.27 |           |

| <b>1-Dy</b>   |         |         |         |         |         |         |
|---------------|---------|---------|---------|---------|---------|---------|
| <b>NEVPT2</b> |         |         |         |         |         |         |
| 0.0           | 23620.2 | 26821.0 | 32566.6 | 52467.1 | 70086.0 | 94804.8 |
| 3.8           | 23696.7 | 26880.6 | 32601.2 | 52486.7 | 70135.0 | 94831.2 |
| 88.3          | 23716.5 | 27119.9 | 32652.4 | 52523.2 | 70149.0 | 94991.6 |
| 263.5         | 23819.5 | 27148.7 | 32716.2 | 52569.5 | 70210.3 | 95018.7 |
| 312.5         | 23845.2 | 29092.5 | 32816.8 | 52633.5 | 70225.7 |         |
| 315.4         | 23845.4 | 29094.6 | 32834.3 | 52637.4 | 70243.3 |         |
| 352.4         | 23871.5 | 29156.1 | 32855.1 | 52660.8 | 70243.6 |         |
| 519.8         | 23945.7 | 29177.3 | 32876.6 | 52681.0 | 70324.4 |         |
| 725.2         | 24003.3 | 29186.5 | 33974.3 | 52705.3 | 70352.3 |         |
| 960.1         | 24016.7 | 29196.6 | 34062.3 | 52712.0 | 70372.3 |         |
| 980.0         | 24022.6 | 29354.4 | 34086.0 | 52742.0 | 70539.4 |         |
| 6204.4        | 24024.3 | 29358.4 | 34147.1 | 52846.1 | 70703.9 |         |
| 6355.8        | 24083.7 | 29401.0 | 34191.6 | 52848.2 | 70792.4 |         |
| 6468.7        | 24113.5 | 29446.4 | 34449.2 | 52893.1 | 70861.1 |         |
| 6583.1        | 24115.7 | 29452.7 | 34662.2 | 52937.0 | 74995.2 |         |
| 6604.4        | 24210.7 | 29460.2 | 34677.8 | 53047.3 | 75080.6 |         |
| 6634.3        | 24210.7 | 29464.0 | 34694.9 | 57839.5 | 75181.8 |         |

|         |         |         |         |         |         |  |
|---------|---------|---------|---------|---------|---------|--|
| 6766.5  | 24233.7 | 29531.7 | 34778.5 | 57841.7 | 75515.5 |  |
| 28897.4 | 24233.8 | 29532.1 | 34878.0 | 57902.1 | 75523.1 |  |
| 29393.1 | 24246.0 | 29586.9 | 34888.8 | 57905.6 | 79816.0 |  |
| 29512.7 | 24252.8 | 29638.8 | 39924.5 | 57933.8 | 79836.7 |  |
|         | 24317.5 | 29833.5 | 40306.1 | 57951.4 | 79923.0 |  |
|         | 24364.8 | 29834.1 | 40426.6 | 57974.2 | 79955.4 |  |
|         | 24468.4 | 29868.7 | 40627.9 | 58053.3 | 79977.8 |  |
|         | 24569.2 | 31203.4 | 40631.7 | 58062.0 | 80005.4 |  |
|         | 24629.4 | 31211.3 | 40652.9 | 58163.8 | 80022.7 |  |
|         | 24809.1 | 31226.4 | 40776.7 | 58172.2 | 80230.7 |  |
|         | 24905.5 | 31243.4 | 42505.2 | 58338.4 | 80236.2 |  |
|         | 24913.2 | 31254.4 | 42512.7 | 58338.6 | 80506.9 |  |
|         | 24960.4 | 31262.3 | 42619.9 | 58447.7 | 80507.3 |  |
|         | 25044.9 | 31289.3 | 42628.1 | 58448.4 | 80622.0 |  |
|         | 25391.4 | 31307.1 | 42689.0 | 60426.8 | 80624.1 |  |
|         | 25426.1 | 31346.6 | 42699.9 | 60526.9 | 88091.7 |  |
|         | 25440.9 | 31370.2 | 42728.4 | 61001.5 | 88290.1 |  |
|         | 25455.0 | 31379.6 | 42738.4 | 65470.0 | 88330.2 |  |
|         | 25482.3 | 31467.6 | 42786.4 | 65521.0 | 88444.9 |  |
|         | 25753.1 | 31482.5 | 42902.5 | 65905.4 | 88725.8 |  |
|         | 25912.4 | 31483.8 | 42924.3 | 65974.1 | 88874.9 |  |
|         | 26207.6 | 31488.5 | 43091.7 | 66042.8 | 88889.2 |  |
|         | 26251.6 | 31492.5 | 43094.6 | 68577.3 | 94514.2 |  |
|         | 26502.2 | 31504.1 | 52287.9 | 70051.7 | 94590.9 |  |
|         | 26573.1 | 32495.4 | 52309.0 | 70068.1 | 94635.5 |  |
|         | 26617.0 | 32509.1 | 52411.7 | 70077.3 | 94657.3 |  |
|         | 26626.1 | 32543.5 | 52415.4 | 70085.6 | 94727.3 |  |

|         |          |          |          |          |
|---------|----------|----------|----------|----------|
| 0.00    | 12841.77 | 29658.55 | 32759.12 | 36941.36 |
| 194.87  | 13596.36 | 29698.61 | 32842.68 | 37035.08 |
| 244.14  | 13616.67 | 29765.74 | 32904.64 | 37067.21 |
| 284.71  | 14049.10 | 29815.09 | 32935.61 | 37107.04 |
| 416.31  | 23908.78 | 29883.42 | 33006.15 | 37145.93 |
| 494.48  | 23970.70 | 29922.65 | 33063.22 | 37235.53 |
| 605.30  | 24014.97 | 29968.38 | 33137.16 | 37286.31 |
| 801.31  | 24156.41 | 30000.08 | 33168.42 | 37335.11 |
| 3139.46 | 24304.39 | 30041.63 | 33360.00 | 37374.60 |
| 3197.49 | 25266.90 | 30062.00 | 34123.25 | 37392.03 |
| 3361.09 | 25305.71 | 30081.03 | 34348.65 | 37404.56 |
| 3414.05 | 25344.57 | 30121.23 | 34473.17 | 37453.12 |
| 3477.08 | 25390.34 | 30182.76 | 34499.53 | 37472.11 |
| 3520.51 | 25414.13 | 30222.11 | 34561.73 | 37512.62 |
| 3581.47 | 25449.45 | 30254.15 | 34585.47 | 37527.80 |
| 5380.27 | 26517.93 | 30377.46 | 34635.40 | 37634.91 |
| 5426.97 | 26638.21 | 30460.55 | 34643.83 | 38119.31 |
| 5548.37 | 26743.97 | 30513.63 | 34676.12 | 38133.59 |
| 5631.30 | 26827.76 | 30615.35 | 34728.15 | 38149.82 |
| 5698.04 | 26875.50 | 30736.61 | 34764.02 | 38171.66 |

|          |          |          |          |          |
|----------|----------|----------|----------|----------|
| 5739.37  | 26941.63 | 31068.11 | 34807.56 | 38184.90 |
| 7074.06  | 26992.69 | 31171.33 | 34834.37 | 38224.53 |
| 7145.12  | 27061.17 | 31188.36 | 34866.96 | 38241.78 |
| 7267.29  | 27364.19 | 31222.07 | 34878.35 | 38291.33 |
| 7356.67  | 27656.72 | 31294.83 | 34917.22 | 38298.31 |
| 7424.21  | 27732.50 | 31309.61 | 34941.65 | 38339.79 |
| 8332.20  | 27804.21 | 31416.74 | 34959.60 | 38345.61 |
| 8375.78  | 27843.78 | 31566.46 | 34972.39 | 38377.09 |
| 8396.07  | 27906.35 | 31668.09 | 34986.40 | 38390.11 |
| 8422.35  | 27950.04 | 31842.32 | 35027.81 | 38428.06 |
| 8437.33  | 28017.81 | 31883.10 | 35051.06 | 38437.91 |
| 8522.83  | 28080.32 | 31913.60 | 35098.32 | 38491.07 |
| 8603.85  | 28163.60 | 31928.35 | 35134.01 | 38520.96 |
| 8645.21  | 28214.04 | 31951.07 | 35148.91 | 38597.81 |
| 8663.84  | 28266.62 | 31976.40 | 35169.63 | 38764.69 |
| 8762.57  | 28327.62 | 32030.94 | 35282.33 | 38859.03 |
| 9422.81  | 28379.51 | 32063.00 | 35719.80 | 39401.80 |
| 9592.70  | 28441.47 | 32150.02 | 35852.28 | 39494.48 |
| 9767.42  | 28594.84 | 32204.01 | 35947.64 | 39543.93 |
| 9845.01  | 28657.83 | 32231.67 | 35975.47 | 39583.60 |
| 9945.35  | 28725.34 | 32282.65 | 36025.51 | 39613.64 |
| 9961.54  | 28801.13 | 32303.89 | 36094.51 | 39706.69 |
| 9996.16  | 28886.73 | 32318.20 | 36134.94 | 39761.68 |
| 10042.96 | 29117.62 | 32377.41 | 36283.61 | 39780.50 |
| 11442.75 | 29182.80 | 32398.01 | 36692.73 | 39821.34 |
| 11549.93 | 29304.62 | 32421.76 | 36729.78 | 39888.75 |
| 11608.20 | 29379.76 | 32501.35 | 36787.22 | 39934.26 |
| 11639.83 | 29449.79 | 32614.98 | 36806.93 | 40056.35 |
| 12725.97 | 29510.87 | 32676.36 | 36848.85 | 40142.85 |
| 12810.98 | 29619.19 | 32746.64 | 36893.44 | 40189.19 |

|          |          |          |          |          |           |
|----------|----------|----------|----------|----------|-----------|
| 40217.65 | 48154.53 | 59216.41 | 67201.67 | 78469.18 | 94781.03  |
| 40226.84 | 48313.79 | 59242.60 | 68035.40 | 79707.77 | 94879.24  |
| 40245.15 | 48333.40 | 59261.03 | 68276.79 | 80367.07 | 94937.30  |
| 40251.39 | 48396.91 | 59349.98 | 68393.44 | 80408.35 | 99677.04  |
| 40273.11 | 48432.26 | 59870.17 | 68537.00 | 80774.45 | 99837.70  |
| 40304.65 | 48483.80 | 59892.02 | 71465.90 | 80879.56 | 100083.92 |
| 40331.10 | 48509.36 | 59932.38 | 71612.99 | 80959.20 | 100429.85 |
| 40350.02 | 48551.47 | 59974.32 | 71747.44 | 81613.77 | 100496.65 |
| 40389.06 | 48646.21 | 60068.92 | 72259.37 | 81768.76 | 100681.35 |
| 40400.33 | 48747.07 | 60153.89 | 72451.51 | 81895.51 | 100747.79 |
| 40822.84 | 49225.13 | 60177.27 | 73585.16 | 82073.91 | 100788.30 |
| 40955.94 | 49244.06 | 60264.86 | 74997.83 | 84215.97 | 100842.67 |
| 40980.73 | 49283.46 | 60368.84 | 75057.80 | 84304.55 | 100883.22 |
| 41101.98 | 49331.25 | 62068.34 | 75144.39 | 84358.49 | 100918.76 |
| 41152.05 | 49441.82 | 62126.89 | 75205.44 | 84402.29 | 100987.08 |
| 41164.18 | 49502.07 | 62157.48 | 75250.13 | 84499.77 | 101030.60 |
| 41191.85 | 49656.09 | 62205.31 | 75300.26 | 84612.36 | 101102.90 |



|          |          |          |          |          |           |
|----------|----------|----------|----------|----------|-----------|
| 41204.03 | 49685.59 | 62244.02 | 75330.33 | 84917.16 | 101119.98 |
| 41261.40 | 49763.18 | 62348.89 | 75342.22 | 85007.98 | 101182.26 |
| 41271.63 | 49893.30 | 62391.40 | 75357.52 | 85694.75 | 101312.26 |
| 41296.93 | 50028.99 | 62583.33 | 75371.07 | 85765.80 | 101488.08 |
| 42230.60 | 56124.12 | 62673.53 | 75397.20 | 85826.14 |           |
| 42267.14 | 56198.49 | 63034.53 | 75419.06 | 85919.88 |           |
| 42320.22 | 56220.28 | 63079.56 | 75442.20 | 85985.40 |           |
| 42411.84 | 56256.39 | 63127.91 | 75451.93 | 86213.56 |           |
| 42493.48 | 56294.00 | 63168.70 | 75483.11 | 86338.36 |           |
| 43318.28 | 56324.82 | 63233.95 | 75500.52 | 86625.39 |           |
| 43402.74 | 56405.69 | 63260.69 | 75526.26 | 86708.07 |           |
| 43957.17 | 56508.72 | 63305.11 | 75533.92 | 86784.37 |           |
| 44101.60 | 56531.98 | 63381.07 | 75551.24 | 86881.28 |           |
| 44163.31 | 56563.88 | 63449.63 | 75570.50 | 87067.74 |           |
| 44731.76 | 56618.49 | 63538.69 | 75592.74 | 87174.57 |           |
| 44899.01 | 56735.11 | 63556.15 | 75599.93 | 87216.04 |           |
| 44989.71 | 56808.70 | 63928.36 | 75625.52 | 87232.14 |           |
| 46114.05 | 56838.45 | 63974.12 | 75651.61 | 87425.12 |           |
| 46270.65 | 56897.65 | 64027.50 | 75663.02 | 87623.84 |           |
| 46374.70 | 56963.04 | 64105.71 | 75682.28 | 87771.49 |           |
| 46439.54 | 57125.97 | 64137.22 | 75696.00 | 92244.60 |           |
| 47037.28 | 57181.96 | 64188.03 | 75949.52 | 92531.16 |           |
| 47105.33 | 57249.22 | 64296.34 | 76025.52 | 93033.57 |           |
| 47174.93 | 57345.47 | 64415.58 | 77588.84 | 93194.87 |           |
| 47200.93 | 57394.53 | 64468.11 | 77754.86 | 93260.01 |           |
| 47224.33 | 57462.45 | 64720.96 | 77830.49 | 93862.33 |           |
| 47291.71 | 58801.73 | 64766.52 | 77912.90 | 93944.03 |           |
| 47392.54 | 59009.32 | 64844.36 | 78064.79 | 93986.09 |           |
| 47534.81 | 59106.92 | 64982.61 | 78158.33 | 94148.07 |           |
| 47972.58 | 59143.13 | 65091.20 | 78367.30 | 94601.24 |           |
| 48059.64 | 59188.10 | 65228.36 | 78418.27 | 94650.70 |           |

**Table S11.** CASSCF computed low-lying 21 sextets (in red) and 224 quartet states (in black) along with spin-orbit coupled states (in blue, Kramer doublets). All the values are reported here in  $\text{cm}^{-1}$ .

| 2-Dy  |         |         |         |         |         |          |
|-------|---------|---------|---------|---------|---------|----------|
| 0.7   | 24093.5 | 25826.4 | 33853.3 | 56641.3 | 76399.4 | 105247.7 |
| 97.3  | 24095.9 | 25894.4 | 33880.9 | 56641.7 | 76411.5 | 105260.7 |
| 193.4 | 24144.5 | 25958.1 | 33886.6 | 56686.3 | 76417.5 | 105390.0 |
| 249.3 | 24151.2 | 26015.9 | 33982.0 | 56705.9 | 76485.0 | 105396.8 |
| 275.4 | 24205.5 | 28990.9 | 34051.7 | 56709.5 | 76491.5 |          |
| 323.4 | 24223.3 | 28994.4 | 34060.3 | 56786.7 | 76500.4 |          |
| 448.5 | 24253.2 | 29065.7 | 34062.2 | 56788.8 | 76501.2 |          |
| 660.9 | 24274.1 | 29067.2 | 34101.1 | 56936.6 | 77750.6 |          |
| 742.9 | 24343.4 | 29087.0 | 36912.5 | 56943.6 | 77792.8 |          |
| 802.5 | 24424.6 | 29103.0 | 36928.3 | 57005.0 | 77825.5 |          |

|         |         |         |         |         |          |  |
|---------|---------|---------|---------|---------|----------|--|
| 7435.3  | 24432.5 | 29189.8 | 36957.4 | 57024.8 | 77933.5  |  |
| 7600.4  | 24449.0 | 29196.0 | 36958.2 | 57032.1 | 78057.8  |  |
| 7649.6  | 24453.9 | 29254.8 | 37090.2 | 57032.5 | 78104.2  |  |
| 7714.2  | 24525.9 | 29260.3 | 37132.7 | 57053.3 | 78198.8  |  |
| 7747.5  | 24567.3 | 29277.8 | 37246.6 | 57085.1 | 84394.1  |  |
| 7801.4  | 24611.2 | 29278.0 | 37260.5 | 57103.5 | 84495.2  |  |
| 7906.6  | 24632.7 | 29286.9 | 37366.2 | 61466.9 | 84532.2  |  |
| 34208.8 | 24639.5 | 29341.2 | 37369.5 | 61467.3 | 84858.3  |  |
| 34661.3 | 24642.6 | 29344.0 | 37382.9 | 61484.2 | 84872.8  |  |
| 34750.7 | 24646.2 | 30425.5 | 37443.3 | 61489.5 | 87203.0  |  |
|         | 24674.8 | 30430.3 | 42506.1 | 61527.4 | 87219.7  |  |
|         | 24693.8 | 30435.4 | 42880.5 | 61547.7 | 87288.4  |  |
|         | 24737.6 | 30451.7 | 42890.2 | 61565.7 | 87303.6  |  |
|         | 24741.8 | 30463.3 | 43020.3 | 61632.3 | 87343.9  |  |
|         | 24774.6 | 30470.8 | 43045.3 | 61646.2 | 87353.2  |  |
|         | 24790.7 | 30492.0 | 43098.6 | 61652.0 | 87360.2  |  |
|         | 24808.9 | 30501.9 | 43199.5 | 61654.9 | 87432.6  |  |
|         | 24849.4 | 30537.8 | 44225.1 | 61873.8 | 87451.6  |  |
|         | 24881.7 | 30547.8 | 44232.2 | 61876.1 | 87759.5  |  |
|         | 24938.4 | 30554.4 | 44393.2 | 61965.5 | 87766.3  |  |
|         | 24940.2 | 30635.8 | 44395.7 | 61966.3 | 87881.6  |  |
|         | 24970.3 | 30645.1 | 44435.2 | 66557.8 | 87885.8  |  |
|         | 24990.2 | 30646.3 | 44440.7 | 66627.6 | 97758.6  |  |
|         | 24991.0 | 30650.9 | 44451.2 | 67042.4 | 97822.5  |  |
|         | 25014.1 | 30660.2 | 44460.0 | 72232.0 | 97904.2  |  |
|         | 25083.2 | 30662.0 | 44478.5 | 72277.5 | 98018.5  |  |
|         | 25085.1 | 32296.5 | 44588.8 | 72577.1 | 98144.0  |  |
|         | 25161.9 | 32336.7 | 44608.5 | 72689.7 | 98382.1  |  |
|         | 25162.7 | 32485.3 | 44750.4 | 72732.3 | 98422.8  |  |
|         | 25670.4 | 32487.8 | 44752.2 | 76074.6 | 104979.0 |  |
|         | 25686.9 | 32521.7 | 56577.9 | 76375.1 | 105006.6 |  |
|         | 25762.5 | 33809.9 | 56578.6 | 76386.3 | 105128.1 |  |
|         | 25788.5 | 33815.8 | 56586.8 | 76389.1 | 105133.5 |  |
|         | 25807.3 | 33846.7 | 56608.0 | 76390.9 | 105163.3 |  |

|         |          |          |          |          |
|---------|----------|----------|----------|----------|
| 0.00    | 14028.04 | 28735.06 | 33943.30 | 37599.85 |
| 148.93  | 14828.59 | 28774.86 | 33949.29 | 37622.34 |
| 192.83  | 14840.46 | 28781.15 | 33975.39 | 37960.58 |
| 300.67  | 15301.31 | 28808.58 | 33987.18 | 37987.40 |
| 361.33  | 24378.14 | 28891.94 | 34032.45 | 38007.63 |
| 450.07  | 24429.66 | 29303.62 | 34061.11 | 38079.65 |
| 513.02  | 24528.99 | 29320.99 | 34083.19 | 38095.68 |
| 624.07  | 24601.98 | 29382.84 | 34102.08 | 38147.84 |
| 3101.86 | 24803.83 | 29415.26 | 34110.77 | 38162.59 |
| 3161.31 | 26521.93 | 29466.59 | 34120.61 | 38312.69 |
| 3341.37 | 26647.49 | 29504.05 | 34140.71 | 38330.96 |
| 3387.99 | 26675.79 | 29510.53 | 34166.76 | 38358.24 |
| 3406.95 | 26755.67 | 29526.23 | 34224.84 | 38365.84 |

|          |          |          |          |          |
|----------|----------|----------|----------|----------|
| 3426.53  | 26810.25 | 29530.33 | 34230.80 | 38486.57 |
| 3457.86  | 26851.05 | 30279.84 | 34259.01 | 38622.34 |
| 5391.24  | 26867.43 | 30362.10 | 34268.93 | 38680.27 |
| 5403.95  | 26911.18 | 30484.04 | 34284.28 | 38726.01 |
| 5539.78  | 27070.23 | 30500.78 | 34301.63 | 38825.99 |
| 5588.64  | 27103.03 | 30532.79 | 35314.53 | 38838.96 |
| 5644.02  | 27124.56 | 30537.09 | 35320.11 | 38853.75 |
| 5690.12  | 27145.39 | 31457.77 | 35356.34 | 38863.70 |
| 7121.70  | 27185.90 | 31531.43 | 35408.05 | 38892.01 |
| 7135.46  | 27255.60 | 31533.55 | 35446.97 | 38909.94 |
| 7259.46  | 27422.64 | 31552.41 | 35502.93 | 38965.37 |
| 7318.74  | 27439.57 | 31588.02 | 35640.32 | 39041.41 |
| 7406.27  | 27449.09 | 31610.05 | 35713.58 | 39554.99 |
| 8461.63  | 27527.17 | 31626.65 | 35724.68 | 39557.42 |
| 8486.31  | 27567.40 | 31656.16 | 35814.22 | 39579.40 |
| 8612.40  | 27674.92 | 31675.98 | 35867.95 | 39598.09 |
| 8747.60  | 27722.24 | 31822.81 | 35889.15 | 39607.77 |
| 9426.58  | 27729.22 | 31840.83 | 35954.75 | 39624.47 |
| 9590.28  | 27748.49 | 31875.57 | 36193.31 | 39678.06 |
| 9628.61  | 27860.66 | 31918.94 | 36225.94 | 39693.06 |
| 9636.46  | 27939.53 | 31920.97 | 36248.48 | 39696.20 |
| 9656.75  | 28240.80 | 32072.35 | 36775.98 | 39712.27 |
| 9712.45  | 28248.03 | 32092.04 | 36897.51 | 39808.37 |
| 9763.43  | 28297.19 | 32128.39 | 36903.11 | 39836.22 |
| 9775.57  | 28364.89 | 32137.60 | 36976.23 | 39858.67 |
| 9809.16  | 28414.72 | 32160.42 | 37313.94 | 39892.04 |
| 10982.10 | 28436.78 | 32189.86 | 37339.15 | 39925.00 |
| 11057.59 | 28449.31 | 32258.23 | 37421.36 | 40367.64 |
| 11082.52 | 28487.49 | 32270.34 | 37423.47 | 40423.93 |
| 11106.91 | 28504.94 | 32293.21 | 37433.56 | 40463.29 |
| 11120.48 | 28540.03 | 32327.81 | 37461.76 | 40512.61 |
| 12615.30 | 28560.62 | 32373.18 | 37471.54 | 40544.04 |
| 12696.97 | 28586.53 | 32748.22 | 37481.48 | 40547.56 |
| 12754.95 | 28631.29 | 32798.61 | 37485.87 | 40565.83 |
| 12776.20 | 28652.98 | 32822.07 | 37509.49 | 40572.44 |
| 13928.89 | 28670.56 | 32918.04 | 37517.80 | 40614.71 |
| 14004.26 | 28727.67 | 33004.23 | 37561.51 | 40625.53 |

|          |          |          |          |          |           |
|----------|----------|----------|----------|----------|-----------|
| 40655.73 | 50159.58 | 63412.30 | 73344.81 | 86000.96 | 104323.84 |
| 40926.35 | 50200.04 | 63424.71 | 74842.85 | 88906.72 | 104455.67 |
| 40949.41 | 50227.02 | 63440.93 | 75063.85 | 89320.13 | 104519.40 |
| 41013.54 | 50300.34 | 63471.92 | 75206.79 | 89346.96 | 110070.28 |
| 41046.82 | 50392.20 | 64071.42 | 75271.89 | 89846.86 | 110233.26 |
| 42184.71 | 50471.50 | 64102.15 | 78193.10 | 89914.90 | 110451.84 |
| 42196.26 | 50587.58 | 64134.05 | 78346.25 | 90011.94 | 110775.91 |
| 42225.53 | 50631.16 | 64155.51 | 78436.07 | 90932.55 | 110852.64 |
| 42261.32 | 50771.96 | 64221.56 | 79125.64 | 90999.04 | 111010.12 |
| 42300.09 | 50776.69 | 64348.08 | 79314.77 | 91144.81 | 111142.40 |

|          |          |          |          |           |           |
|----------|----------|----------|----------|-----------|-----------|
| 42373.74 | 50891.62 | 64384.86 | 80340.69 | 91330.58  | 111191.90 |
| 42466.74 | 50963.96 | 64442.05 | 81611.38 | 91574.50  | 111219.74 |
| 42506.74 | 50982.25 | 64508.39 | 81617.46 | 91620.03  | 111280.95 |
| 42606.56 | 51027.47 | 65687.81 | 81640.48 | 91691.50  | 111311.34 |
| 42643.18 | 51114.64 | 65696.37 | 81656.10 | 91702.07  | 111360.01 |
| 42707.39 | 51181.99 | 65750.81 | 81689.15 | 91767.28  | 111381.25 |
| 42737.87 | 51329.74 | 65761.30 | 81704.82 | 91780.75  | 111430.75 |
| 43338.44 | 51425.12 | 65818.47 | 81712.85 | 92147.24  | 111485.92 |
| 43488.36 | 51463.28 | 65861.81 | 81725.51 | 92232.19  | 111500.16 |
| 43492.16 | 51560.27 | 65908.96 | 81736.51 | 93026.73  | 111649.34 |
| 43557.20 | 51684.89 | 66107.67 | 81749.18 | 93031.33  | 111792.33 |
| 44651.79 | 60309.71 | 66176.28 | 81767.82 | 93096.25  |           |
| 44689.19 | 60369.23 | 66658.79 | 81785.71 | 93120.44  |           |
| 44724.52 | 60409.72 | 66668.11 | 81794.22 | 93192.75  |           |
| 45525.16 | 60447.95 | 66714.55 | 81815.00 | 93427.11  |           |
| 45590.46 | 60480.74 | 66757.75 | 81836.34 | 93532.38  |           |
| 46075.78 | 60508.16 | 66799.74 | 81858.60 | 93947.66  |           |
| 46096.98 | 60645.24 | 66838.86 | 81865.56 | 93975.16  |           |
| 47003.05 | 60733.61 | 66998.18 | 81902.02 | 94032.17  |           |
| 47022.56 | 60750.15 | 67075.03 | 81914.84 | 94079.60  |           |
| 47044.11 | 60817.40 | 67548.20 | 81917.81 | 94293.60  |           |
| 47552.87 | 60855.50 | 67564.85 | 81925.01 | 94421.02  |           |
| 47697.76 | 60929.40 | 67619.40 | 81949.13 | 94517.90  |           |
| 47815.43 | 60959.49 | 67681.00 | 82402.10 | 94532.32  |           |
| 48631.60 | 60991.89 | 67693.40 | 82456.35 | 94615.66  |           |
| 48722.25 | 61000.66 | 67853.31 | 82561.59 | 94855.00  |           |
| 48789.51 | 61055.46 | 67941.42 | 82610.87 | 94999.95  |           |
| 48841.69 | 61255.43 | 68336.37 | 82627.54 | 101819.87 |           |
| 48861.94 | 61317.81 | 68355.85 | 83160.37 | 102054.55 |           |
| 48881.92 | 61501.71 | 68439.79 | 83241.89 | 102619.02 |           |
| 48898.16 | 61602.09 | 68483.57 | 84913.42 | 102740.15 |           |
| 48933.26 | 61614.65 | 68644.84 | 85040.94 | 102804.02 |           |
| 48944.34 | 61749.36 | 68754.38 | 85113.50 | 103466.02 |           |
| 48989.72 | 63077.48 | 69485.64 | 85197.66 | 103544.15 |           |
| 49082.99 | 63323.68 | 69602.57 | 85650.73 | 103564.97 |           |
| 49204.47 | 63340.43 | 69733.95 | 85780.53 | 103697.76 |           |
| 50055.78 | 63371.44 | 70458.08 | 85868.35 | 104237.83 |           |
| 50131.05 | 63384.61 | 70737.05 | 85970.76 | 104254.85 |           |

**Table S12.** CASSCF computed low-lying 21 sextets (in red) and 224 quartet states (in black) along with spin-orbit coupled states (in blue, Kramer doublets). All the values are reported here in  $\text{cm}^{-1}$ .

| 3-Dy  |         |         |         |         |         |          |
|-------|---------|---------|---------|---------|---------|----------|
| 0.0   | 24110.6 | 25874.9 | 33889.1 | 56661.6 | 76435.3 | 105300.1 |
| 8.6   | 24115.9 | 25928.3 | 33922.8 | 56668.9 | 76460.4 | 105335.1 |
| 108.0 | 24159.5 | 25993.8 | 33938.6 | 56727.7 | 76468.7 | 105449.0 |
| 270.8 | 24186.5 | 26068.1 | 34013.3 | 56769.8 | 76527.0 | 105469.0 |

|         |         |         |         |         |          |  |
|---------|---------|---------|---------|---------|----------|--|
| 291.1   | 24220.8 | 29032.1 | 34089.6 | 56771.9 | 76535.3  |  |
| 297.7   | 24223.9 | 29033.3 | 34101.8 | 56804.0 | 76548.3  |  |
| 355.9   | 24277.5 | 29099.1 | 34109.9 | 56824.1 | 76550.0  |  |
| 456.5   | 24282.8 | 29115.1 | 34136.5 | 56993.2 | 77802.0  |  |
| 676.8   | 24357.5 | 29121.4 | 36916.6 | 57003.1 | 77818.7  |  |
| 833.2   | 24455.5 | 29129.3 | 36923.7 | 57047.6 | 77845.7  |  |
| 865.4   | 24473.0 | 29234.0 | 37005.1 | 57075.1 | 77991.2  |  |
| 7467.4  | 24493.7 | 29238.1 | 37014.1 | 57076.6 | 78115.8  |  |
| 7599.4  | 24500.0 | 29299.1 | 37147.0 | 57092.7 | 78180.3  |  |
| 7681.4  | 24572.0 | 29308.9 | 37156.1 | 57101.1 | 78230.9  |  |
| 7756.5  | 24587.3 | 29312.6 | 37279.6 | 57117.2 | 84435.0  |  |
| 7797.9  | 24620.1 | 29317.3 | 37304.0 | 57122.0 | 84530.8  |  |
| 7849.3  | 24660.5 | 29319.7 | 37402.5 | 61482.2 | 84579.2  |  |
| 7963.9  | 24667.6 | 29391.3 | 37430.1 | 61486.5 | 84909.3  |  |
| 34238.8 | 24678.2 | 29391.5 | 37437.8 | 61500.6 | 84919.3  |  |
| 34734.9 | 24685.3 | 30450.9 | 37516.2 | 61512.3 | 87218.5  |  |
| 34765.6 | 24687.5 | 30459.4 | 42537.3 | 61562.2 | 87240.1  |  |
|         | 24719.8 | 30463.3 | 42856.9 | 61585.7 | 87315.2  |  |
|         | 24759.1 | 30478.2 | 42925.7 | 61588.9 | 87330.1  |  |
|         | 24766.3 | 30492.6 | 43067.5 | 61670.8 | 87355.5  |  |
|         | 24797.9 | 30504.8 | 43109.7 | 61681.6 | 87366.7  |  |
|         | 24835.7 | 30522.2 | 43157.7 | 61754.0 | 87396.2  |  |
|         | 24856.2 | 30537.0 | 43265.2 | 61757.7 | 87553.8  |  |
|         | 24870.3 | 30577.0 | 44272.3 | 61920.1 | 87563.6  |  |
|         | 24934.3 | 30588.2 | 44278.8 | 61921.5 | 87814.9  |  |
|         | 24983.1 | 30598.1 | 44392.9 | 62019.5 | 87818.1  |  |
|         | 25005.7 | 30687.6 | 44395.8 | 62019.8 | 87933.9  |  |
|         | 25016.4 | 30698.7 | 44454.1 | 66612.5 | 87938.0  |  |
|         | 25027.7 | 30701.9 | 44467.8 | 66645.0 | 97747.5  |  |
|         | 25030.6 | 30702.8 | 44490.9 | 67095.3 | 97911.6  |  |
|         | 25072.4 | 30706.5 | 44514.3 | 72260.2 | 97929.5  |  |
|         | 25138.0 | 30713.0 | 44526.0 | 72309.8 | 98041.9  |  |
|         | 25143.1 | 32315.9 | 44651.2 | 72662.4 | 98244.2  |  |
|         | 25216.3 | 32363.9 | 44672.1 | 72697.6 | 98435.0  |  |
|         | 25217.0 | 32524.1 | 44808.6 | 72786.8 | 98456.7  |  |
|         | 25718.0 | 32539.4 | 44812.0 | 76120.0 | 105029.9 |  |
|         | 25723.9 | 32576.1 | 56599.3 | 76411.2 | 105065.4 |  |
|         | 25807.7 | 33840.3 | 56613.7 | 76421.9 | 105138.7 |  |
|         | 25840.7 | 33845.7 | 56621.3 | 76425.4 | 105144.3 |  |
|         | 25852.9 | 33885.4 | 56640.0 | 76427.0 | 105206.1 |  |

|        |          |          |          |          |
|--------|----------|----------|----------|----------|
| 0.00   | 14059.72 | 28777.00 | 33953.08 | 37630.73 |
| 178.97 | 14856.84 | 28804.99 | 33960.15 | 37651.72 |
| 233.56 | 14872.64 | 28822.74 | 33984.59 | 37982.21 |
| 277.55 | 15331.35 | 28851.48 | 34005.70 | 38016.84 |
| 397.43 | 24382.91 | 28931.87 | 34057.85 | 38041.46 |
| 459.37 | 24443.20 | 29336.03 | 34085.86 | 38109.20 |
| 544.24 | 24544.08 | 29346.00 | 34107.57 | 38124.58 |

|          |          |          |          |          |
|----------|----------|----------|----------|----------|
| 688.73   | 24638.99 | 29402.56 | 34133.07 | 38182.66 |
| 3124.85  | 24848.17 | 29434.91 | 34140.20 | 38195.90 |
| 3181.68  | 26526.70 | 29504.58 | 34153.05 | 38339.06 |
| 3354.80  | 26675.52 | 29532.14 | 34183.55 | 38357.19 |
| 3385.78  | 26713.92 | 29552.80 | 34207.39 | 38390.25 |
| 3433.04  | 26772.27 | 29561.25 | 34264.81 | 38401.40 |
| 3473.96  | 26826.29 | 29575.22 | 34268.04 | 38505.26 |
| 3497.93  | 26873.79 | 30301.83 | 34298.49 | 38654.92 |
| 5412.86  | 26890.30 | 30388.66 | 34307.64 | 38722.53 |
| 5421.12  | 26929.03 | 30493.37 | 34319.91 | 38738.10 |
| 5554.85  | 27101.74 | 30521.56 | 34337.48 | 38853.02 |
| 5630.28  | 27109.98 | 30568.16 | 35332.36 | 38867.16 |
| 5676.58  | 27156.04 | 30580.15 | 35342.33 | 38886.50 |
| 5707.92  | 27174.81 | 31485.46 | 35380.42 | 38895.12 |
| 7128.19  | 27214.10 | 31546.20 | 35435.54 | 38920.76 |
| 7161.57  | 27291.28 | 31553.93 | 35479.48 | 38940.44 |
| 7291.66  | 27425.43 | 31573.82 | 35540.16 | 39004.09 |
| 7356.04  | 27448.13 | 31609.78 | 35666.21 | 39080.62 |
| 7423.81  | 27457.92 | 31642.08 | 35738.30 | 39581.05 |
| 8479.08  | 27529.14 | 31654.90 | 35764.97 | 39585.37 |
| 8500.09  | 27620.61 | 31693.81 | 35834.13 | 39611.21 |
| 8659.21  | 27728.02 | 31711.82 | 35901.39 | 39631.90 |
| 8763.19  | 27740.26 | 31839.96 | 35911.36 | 39638.48 |
| 9451.88  | 27750.46 | 31857.05 | 35994.14 | 39646.39 |
| 9617.78  | 27790.24 | 31894.09 | 36218.17 | 39709.94 |
| 9642.24  | 27906.70 | 31947.90 | 36257.45 | 39723.94 |
| 9650.39  | 27976.96 | 31964.45 | 36281.28 | 39725.59 |
| 9674.14  | 28247.60 | 32095.88 | 36790.73 | 39742.70 |
| 9739.81  | 28267.12 | 32112.32 | 36927.73 | 39835.50 |
| 9805.90  | 28311.06 | 32154.07 | 36934.24 | 39865.80 |
| 9818.25  | 28384.03 | 32164.72 | 37010.19 | 39892.07 |
| 9849.07  | 28431.54 | 32193.04 | 37338.61 | 39920.62 |
| 11004.73 | 28457.29 | 32222.67 | 37360.51 | 39962.84 |
| 11086.87 | 28465.37 | 32285.74 | 37448.32 | 40401.59 |
| 11108.06 | 28504.89 | 32302.00 | 37452.40 | 40437.42 |
| 11139.72 | 28512.53 | 32317.80 | 37461.60 | 40500.61 |
| 11156.33 | 28566.58 | 32368.74 | 37489.72 | 40546.59 |
| 12635.57 | 28585.48 | 32410.08 | 37504.84 | 40570.51 |
| 12726.97 | 28621.18 | 32776.78 | 37512.99 | 40575.97 |
| 12786.15 | 28667.53 | 32832.99 | 37517.48 | 40594.67 |
| 12810.26 | 28701.57 | 32856.65 | 37535.41 | 40602.92 |
| 13951.43 | 28709.94 | 32939.95 | 37554.69 | 40647.59 |
| 14034.86 | 28764.72 | 33047.59 | 37589.13 | 40661.60 |

|          |          |          |          |          |           |
|----------|----------|----------|----------|----------|-----------|
| 40693.23 | 50187.44 | 63442.95 | 73377.70 | 86038.53 | 104386.17 |
| 40958.52 | 50220.13 | 63452.51 | 74867.94 | 88941.40 | 104497.60 |
| 40975.38 | 50256.07 | 63478.01 | 75098.92 | 89352.25 | 104550.84 |
| 41051.62 | 50339.48 | 63503.17 | 75224.73 | 89384.28 | 110108.43 |

|          |          |          |          |           |           |
|----------|----------|----------|----------|-----------|-----------|
| 41075.53 | 50426.56 | 64104.04 | 75327.29 | 89877.18  | 110259.70 |
| 42202.31 | 50506.30 | 64130.48 | 78221.56 | 89957.09  | 110497.09 |
| 42216.14 | 50592.99 | 64165.54 | 78374.02 | 90046.89  | 110826.47 |
| 42242.61 | 50664.19 | 64185.34 | 78474.34 | 90941.27  | 110864.91 |
| 42294.83 | 50819.23 | 64256.17 | 79157.03 | 91056.25  | 111049.78 |
| 42356.05 | 50826.36 | 64382.96 | 79352.11 | 91178.79  | 111186.99 |
| 42404.03 | 50941.73 | 64409.07 | 80373.90 | 91364.72  | 111222.60 |
| 42503.87 | 50973.86 | 64474.74 | 81641.38 | 91579.33  | 111248.13 |
| 42527.27 | 51004.60 | 64543.46 | 81646.26 | 91637.46  | 111292.40 |
| 42641.81 | 51053.45 | 65694.34 | 81665.73 | 91694.01  | 111342.60 |
| 42667.99 | 51155.36 | 65706.46 | 81683.90 | 91732.50  | 111396.46 |
| 42739.75 | 51214.88 | 65768.33 | 81715.06 | 91817.02  | 111433.11 |
| 42783.84 | 51379.31 | 65797.34 | 81734.89 | 91878.84  | 111486.28 |
| 43365.42 | 51425.70 | 65840.68 | 81752.19 | 92192.73  | 111532.30 |
| 43505.03 | 51492.67 | 65938.87 | 81753.99 | 92277.44  | 111546.05 |
| 43536.89 | 51610.59 | 65957.62 | 81770.89 | 93029.78  | 111696.34 |
| 43593.71 | 51732.25 | 66145.17 | 81780.13 | 93047.08  | 111848.40 |
| 44677.60 | 60335.89 | 66221.83 | 81795.12 | 93124.95  |           |
| 44723.91 | 60397.85 | 66667.14 | 81816.43 | 93197.35  |           |
| 44754.24 | 60440.55 | 66686.77 | 81829.49 | 93235.16  |           |
| 45552.61 | 60477.27 | 66746.38 | 81851.57 | 93466.46  |           |
| 45620.85 | 60515.21 | 66780.50 | 81871.28 | 93578.40  |           |
| 46104.33 | 60535.10 | 66865.28 | 81891.41 | 93949.75  |           |
| 46130.40 | 60671.75 | 66883.22 | 81898.40 | 94001.34  |           |
| 47032.30 | 60768.01 | 67032.89 | 81938.65 | 94084.52  |           |
| 47054.82 | 60780.30 | 67121.01 | 81952.81 | 94134.60  |           |
| 47077.63 | 60837.63 | 67559.29 | 81960.14 | 94330.63  |           |
| 47572.99 | 60887.77 | 67587.41 | 81965.08 | 94466.03  |           |
| 47738.52 | 60944.55 | 67644.49 | 81988.54 | 94526.00  |           |
| 47849.24 | 60991.96 | 67717.40 | 82429.24 | 94546.24  |           |
| 48664.51 | 61003.10 | 67760.20 | 82490.75 | 94706.67  |           |
| 48759.57 | 61063.90 | 67886.69 | 82600.45 | 94896.27  |           |
| 48813.30 | 61101.27 | 67986.68 | 82662.62 | 95044.02  |           |
| 48861.41 | 61291.40 | 68349.33 | 82669.93 | 101844.79 |           |
| 48876.08 | 61352.24 | 68372.70 | 83194.48 | 102092.73 |           |
| 48914.27 | 61527.37 | 68463.25 | 83276.58 | 102648.67 |           |
| 48936.26 | 61633.27 | 68563.15 | 84934.82 | 102778.44 |           |
| 48945.30 | 61651.22 | 68678.32 | 85077.40 | 102842.18 |           |
| 48967.62 | 61779.01 | 68798.76 | 85158.78 | 103505.68 |           |
| 49030.14 | 63104.19 | 69514.77 | 85230.72 | 103563.58 |           |
| 49130.19 | 63350.75 | 69634.06 | 85680.06 | 103596.39 |           |
| 49248.26 | 63368.37 | 69768.95 | 85816.95 | 103746.31 |           |
| 50103.75 | 63406.33 | 70487.49 | 85901.68 | 104264.42 |           |
| 50138.32 | 63417.73 | 70778.16 | 86011.65 | 104287.80 |           |

**Table S13.** CASSCF computed low-lying 21 sextets (in red) and 224 quartet states (in black) along with spin-orbit coupled states (in blue, Kramer doublets). All the values are reported here in  $\text{cm}^{-1}$ .

| 4-Dy    |         |         |         |         |          |          |
|---------|---------|---------|---------|---------|----------|----------|
| 0.0     | 24124.7 | 25882.7 | 33901.5 | 56686.5 | 76460.2  | 105331.2 |
| 8.6     | 24129.2 | 25941.7 | 33936.3 | 56692.1 | 76477.6  | 105360.3 |
| 124.6   | 24172.5 | 26005.4 | 33954.3 | 56738.3 | 76484.7  | 105481.0 |
| 272.7   | 24202.2 | 26073.8 | 34027.3 | 56772.9 | 76551.5  | 105497.4 |
| 285.3   | 24237.7 | 29043.4 | 34099.4 | 56775.8 | 76559.6  |          |
| 330.9   | 24242.6 | 29044.3 | 34111.5 | 56830.0 | 76572.2  |          |
| 360.6   | 24304.0 | 29109.7 | 34119.9 | 56846.4 | 76574.1  |          |
| 466.2   | 24304.3 | 29125.3 | 34142.9 | 57012.4 | 77823.7  |          |
| 675.4   | 24374.8 | 29131.1 | 36932.6 | 57021.6 | 77833.1  |          |
| 824.0   | 24465.6 | 29136.7 | 36953.0 | 57084.7 | 77882.1  |          |
| 859.0   | 24482.6 | 29251.3 | 37017.7 | 57098.9 | 78014.3  |          |
| 7476.5  | 24510.7 | 29254.7 | 37032.3 | 57101.1 | 78131.0  |          |
| 7610.3  | 24512.9 | 29306.4 | 37156.4 | 57102.1 | 78197.5  |          |
| 7691.5  | 24586.5 | 29311.2 | 37174.2 | 57107.5 | 78265.3  |          |
| 7757.0  | 24598.4 | 29313.1 | 37284.7 | 57139.0 | 84451.0  |          |
| 7804.3  | 24640.6 | 29323.8 | 37308.0 | 57156.4 | 84569.7  |          |
| 7849.2  | 24682.3 | 29328.6 | 37413.4 | 61503.4 | 84583.0  |          |
| 7960.4  | 24690.0 | 29396.9 | 37438.1 | 61505.2 | 84942.5  |          |
| 34239.6 | 24698.0 | 29397.5 | 37444.2 | 61522.1 | 84951.9  |          |
| 34758.2 | 24702.0 | 30467.5 | 37526.6 | 61529.3 | 87251.0  |          |
| 34777.6 | 24704.5 | 30475.6 | 42555.7 | 61579.4 | 87268.4  |          |
|         | 24732.9 | 30481.8 | 42880.2 | 61605.6 | 87338.2  |          |
|         | 24770.0 | 30494.4 | 42948.7 | 61614.6 | 87355.6  |          |
|         | 24779.7 | 30507.9 | 43069.8 | 61696.9 | 87392.7  |          |
|         | 24804.4 | 30520.2 | 43128.4 | 61708.4 | 87402.3  |          |
|         | 24841.0 | 30534.0 | 43165.2 | 61750.3 | 87420.2  |          |
|         | 24858.7 | 30550.6 | 43268.9 | 61753.7 | 87554.2  |          |
|         | 24874.0 | 30588.2 | 44276.9 | 61942.2 | 87566.5  |          |
|         | 24941.7 | 30598.0 | 44284.0 | 61943.3 | 87846.1  |          |
|         | 24989.2 | 30607.3 | 44418.3 | 62040.1 | 87848.6  |          |
|         | 25008.8 | 30694.6 | 44422.1 | 62040.3 | 87961.0  |          |
|         | 25019.7 | 30705.9 | 44480.2 | 66636.6 | 87964.3  |          |
|         | 25031.7 | 30706.6 | 44490.7 | 66648.9 | 97789.6  |          |
|         | 25035.5 | 30709.0 | 44503.8 | 67125.6 | 97925.3  |          |
|         | 25074.8 | 30712.9 | 44530.1 | 72273.7 | 97950.3  |          |
|         | 25134.2 | 30718.5 | 44535.4 | 72324.2 | 98073.4  |          |
|         | 25139.5 | 32331.6 | 44656.3 | 72672.5 | 98253.6  |          |
|         | 25221.6 | 32380.8 | 44676.7 | 72741.9 | 98472.0  |          |
|         | 25222.2 | 32533.9 | 44820.8 | 72813.0 | 98492.8  |          |
|         | 25721.0 | 32548.8 | 44823.6 | 76144.3 | 105051.6 |          |
|         | 25723.1 | 32579.2 | 56610.6 | 76437.9 | 105085.0 |          |
|         | 25816.0 | 33854.4 | 56625.1 | 76444.5 | 105178.5 |          |
|         | 25845.0 | 33860.1 | 56641.5 | 76447.4 | 105187.2 |          |
|         | 25863.2 | 33896.8 | 56651.3 | 76450.0 | 105241.5 |          |

|        |          |          |          |          |
|--------|----------|----------|----------|----------|
| 0.00   | 14063.57 | 28782.00 | 33970.48 | 37644.63 |
| 176.84 | 14863.36 | 28811.04 | 33976.71 | 37663.54 |



|          |          |          |          |          |
|----------|----------|----------|----------|----------|
| 233.84   | 14877.44 | 28825.49 | 34001.89 | 37996.49 |
| 309.02   | 15337.55 | 28852.92 | 34023.48 | 38029.45 |
| 392.36   | 24396.55 | 28934.53 | 34071.37 | 38056.09 |
| 469.32   | 24464.79 | 29348.97 | 34101.03 | 38123.34 |
| 552.22   | 24557.94 | 29359.28 | 34116.10 | 38138.07 |
| 682.11   | 24647.18 | 29416.79 | 34142.97 | 38192.59 |
| 3123.74  | 24849.90 | 29445.78 | 34153.07 | 38205.29 |
| 3181.75  | 26539.85 | 29517.15 | 34164.08 | 38353.85 |
| 3358.63  | 26683.77 | 29539.62 | 34192.85 | 38368.67 |
| 3403.98  | 26726.84 | 29561.55 | 34215.97 | 38402.71 |
| 3442.59  | 26786.63 | 29568.22 | 34273.10 | 38413.65 |
| 3472.46  | 26844.91 | 29582.32 | 34278.06 | 38520.28 |
| 3501.79  | 26893.08 | 30310.56 | 34305.13 | 38660.51 |
| 5410.99  | 26906.56 | 30397.20 | 34314.65 | 38731.15 |
| 5426.80  | 26940.91 | 30511.19 | 34327.28 | 38755.67 |
| 5567.07  | 27108.74 | 30534.65 | 34345.93 | 38868.18 |
| 5632.88  | 27127.33 | 30581.68 | 35346.90 | 38879.32 |
| 5679.50  | 27166.30 | 30588.88 | 35356.95 | 38898.60 |
| 5716.94  | 27184.38 | 31499.06 | 35394.93 | 38906.46 |
| 7136.29  | 27222.48 | 31559.94 | 35446.73 | 38933.05 |
| 7164.24  | 27300.10 | 31566.82 | 35488.73 | 38952.53 |
| 7301.46  | 27430.37 | 31582.18 | 35550.26 | 39015.28 |
| 7355.13  | 27474.04 | 31623.99 | 35677.17 | 39087.57 |
| 7432.73  | 27484.22 | 31652.20 | 35749.06 | 39595.65 |
| 8485.62  | 27545.49 | 31666.60 | 35775.08 | 39599.21 |
| 8509.43  | 27625.29 | 31698.79 | 35853.34 | 39623.36 |
| 8657.31  | 27733.68 | 31719.98 | 35909.74 | 39643.17 |
| 8775.20  | 27750.70 | 31857.02 | 35924.70 | 39649.71 |
| 9453.36  | 27759.30 | 31875.65 | 36002.41 | 39660.90 |
| 9621.13  | 27794.88 | 31909.38 | 36231.57 | 39723.71 |
| 9652.52  | 27905.43 | 31958.99 | 36268.55 | 39735.86 |
| 9663.44  | 27985.23 | 31978.13 | 36291.47 | 39737.91 |
| 9683.57  | 28261.33 | 32106.82 | 36805.66 | 39755.41 |
| 9746.08  | 28279.11 | 32129.02 | 36939.52 | 39847.21 |
| 9804.73  | 28327.06 | 32164.81 | 36949.18 | 39878.62 |
| 9819.85  | 28401.06 | 32173.06 | 37019.73 | 39903.98 |
| 9851.74  | 28448.72 | 32201.18 | 37353.55 | 39934.20 |
| 11012.02 | 28472.69 | 32232.86 | 37373.74 | 39973.35 |
| 11091.56 | 28481.68 | 32295.22 | 37462.26 | 40412.20 |
| 11113.27 | 28520.30 | 32314.61 | 37467.22 | 40455.64 |
| 11144.60 | 28530.21 | 32325.94 | 37477.17 | 40511.42 |
| 11159.18 | 28576.42 | 32378.73 | 37500.24 | 40560.95 |
| 12644.26 | 28599.72 | 32418.13 | 37520.87 | 40584.84 |
| 12733.60 | 28632.39 | 32782.35 | 37523.53 | 40589.99 |
| 12790.10 | 28673.71 | 32843.85 | 37529.06 | 40608.78 |
| 12813.52 | 28708.66 | 32866.61 | 37548.74 | 40616.56 |
| 13960.08 | 28719.17 | 32954.16 | 37562.21 | 40659.63 |
| 14040.99 | 28769.39 | 33054.37 | 37603.80 | 40672.58 |

|          |          |          |          |           |           |
|----------|----------|----------|----------|-----------|-----------|
| 40702.60 | 50201.20 | 63464.34 | 73398.87 | 86066.95  | 104409.05 |
| 40968.71 | 50238.33 | 63472.49 | 74880.77 | 88963.62  | 104527.67 |
| 40990.21 | 50274.03 | 63500.30 | 75118.99 | 89380.67  | 104584.30 |
| 41061.85 | 50352.73 | 63523.52 | 75261.01 | 89407.38  | 110133.09 |
| 41090.47 | 50447.49 | 64122.47 | 75346.91 | 89905.91  | 110292.72 |
| 42216.97 | 50517.33 | 64150.33 | 78239.32 | 89979.44  | 110535.75 |
| 42229.11 | 50614.86 | 64186.58 | 78400.38 | 90075.37  | 110846.63 |
| 42264.48 | 50680.57 | 64206.01 | 78498.66 | 90974.06  | 110899.32 |
| 42307.35 | 50825.54 | 64277.57 | 79177.63 | 91070.49  | 111081.54 |
| 42358.20 | 50842.49 | 64399.88 | 79377.31 | 91208.38  | 111209.85 |
| 42421.18 | 50947.26 | 64430.22 | 80399.80 | 91399.32  | 111258.54 |
| 42518.32 | 50995.18 | 64495.27 | 81664.28 | 91611.08  | 111280.09 |
| 42546.55 | 51019.45 | 64566.22 | 81668.98 | 91658.17  | 111333.42 |
| 42653.39 | 51071.15 | 65715.30 | 81691.88 | 91731.39  | 111375.16 |
| 42680.77 | 51167.18 | 65727.17 | 81708.88 | 91752.95  | 111427.74 |
| 42750.17 | 51236.91 | 65789.87 | 81741.38 | 91846.75  | 111460.53 |
| 42796.02 | 51386.89 | 65811.34 | 81760.61 | 91885.46  | 111509.64 |
| 43383.17 | 51448.98 | 65866.82 | 81771.63 | 92225.02  | 111566.91 |
| 43517.02 | 51510.68 | 65952.62 | 81777.51 | 92306.96  | 111577.98 |
| 43551.57 | 51618.47 | 65966.30 | 81794.81 | 93061.05  | 111731.13 |
| 43603.83 | 51746.25 | 66168.11 | 81804.48 | 93073.02  | 111889.10 |
| 44691.82 | 60350.64 | 66243.91 | 81820.54 | 93148.28  |           |
| 44737.29 | 60415.63 | 66690.65 | 81839.35 | 93205.86  |           |
| 44768.33 | 60457.83 | 66705.52 | 81853.58 | 93263.58  |           |
| 45567.04 | 60497.06 | 66762.24 | 81871.18 | 93498.83  |           |
| 45636.02 | 60534.18 | 66805.51 | 81894.78 | 93612.80  |           |
| 46118.96 | 60557.99 | 66881.57 | 81917.75 | 93982.46  |           |
| 46144.57 | 60686.73 | 66891.89 | 81924.93 | 94024.43  |           |
| 47046.11 | 60783.92 | 67056.08 | 81960.08 | 94102.79  |           |
| 47068.42 | 60799.51 | 67143.21 | 81977.49 | 94152.05  |           |
| 47090.78 | 60860.02 | 67582.74 | 81983.09 | 94362.42  |           |
| 47589.90 | 60906.43 | 67605.40 | 81988.49 | 94500.74  |           |
| 47753.25 | 60965.52 | 67666.21 | 82012.63 | 94554.29  |           |
| 47863.69 | 61006.99 | 67743.48 | 82449.49 | 94576.98  |           |
| 48679.22 | 61028.80 | 67761.23 | 82513.34 | 94712.42  |           |
| 48766.69 | 61070.93 | 67910.00 | 82625.74 | 94925.67  |           |
| 48828.49 | 61120.00 | 68008.84 | 82688.28 | 95075.32  |           |
| 48883.12 | 61314.68 | 68370.39 | 82696.28 | 101871.92 |           |
| 48891.56 | 61375.90 | 68395.02 | 83216.16 | 102117.66 |           |
| 48928.79 | 61543.65 | 68489.87 | 83301.05 | 102679.99 |           |
| 48951.42 | 61652.36 | 68564.75 | 84961.50 | 102806.50 |           |
| 48965.63 | 61670.10 | 68701.86 | 85101.23 | 102869.09 |           |
| 48986.60 | 61799.06 | 68820.52 | 85177.47 | 103532.52 |           |
| 49043.26 | 63115.59 | 69529.24 | 85259.58 | 103600.70 |           |
| 49140.04 | 63374.08 | 69652.76 | 85699.95 | 103625.89 |           |
| 49265.48 | 63389.36 | 69790.23 | 85842.35 | 103770.70 |           |
| 50108.65 | 63424.51 | 70504.74 | 85925.90 | 104293.32 |           |
| 50159.58 | 63437.95 | 70806.63 | 86039.27 | 104315.87 |           |

**Table S14.** CASSCF computed low-lying 21 sextets (in red) and 224 quartet states (in black) along with spin-orbit coupled states (in blue, Kramer doublets). All the values are reported here in cm<sup>-1</sup>.

| <b>5-Dy</b> |         |         |         |         |          |          |
|-------------|---------|---------|---------|---------|----------|----------|
| 0.0         | 24225.8 | 26622.4 | 34373.9 | 56841.5 | 76703.5  | 105897.7 |
| 18.2        | 24247.1 | 26705.7 | 34431.9 | 56967.2 | 76709.7  | 105902.4 |
| 739.3       | 24463.0 | 26850.4 | 34548.3 | 56980.0 | 76736.2  | 106049.7 |
| 845.5       | 24492.0 | 26885.0 | 34570.9 | 57048.9 | 76753.5  | 106189.6 |
| 931.6       | 24554.5 | 29339.6 | 34617.9 | 57119.5 | 76768.2  |          |
| 995.8       | 24606.3 | 29395.8 | 34657.6 | 57331.2 | 77069.7  |          |
| 1295.6      | 24647.7 | 29538.2 | 34684.4 | 57388.9 | 77079.5  |          |
| 1356.4      | 24660.1 | 29551.4 | 34712.6 | 57394.0 | 77805.4  |          |
| 1509.9      | 24740.4 | 29617.5 | 37174.1 | 57433.9 | 78103.7  |          |
| 1760.7      | 24841.5 | 29647.4 | 37269.3 | 57503.0 | 78491.3  |          |
| 1799.9      | 24859.3 | 29710.4 | 37401.4 | 57578.8 | 78550.8  |          |
| 7973.4      | 24877.4 | 29739.5 | 37480.7 | 57688.3 | 78605.6  |          |
| 8233.2      | 24933.1 | 29754.6 | 37634.1 | 57947.6 | 78716.3  |          |
| 8280.6      | 24946.1 | 29766.4 | 37738.0 | 57988.2 | 78890.8  |          |
| 8445.1      | 25009.0 | 29823.6 | 37786.5 | 58015.0 | 84334.7  |          |
| 8538.7      | 25030.1 | 29831.8 | 37909.6 | 58023.9 | 84450.1  |          |
| 8618.1      | 25055.5 | 29985.2 | 37961.2 | 61630.9 | 84805.1  |          |
| 8719.7      | 25134.5 | 30003.8 | 38053.7 | 61632.6 | 85686.2  |          |
| 34228.3     | 25141.8 | 30053.0 | 38230.4 | 61784.9 | 85708.4  |          |
| 35311.5     | 25173.2 | 30994.1 | 38293.7 | 61787.6 | 87208.5  |          |
| 35814.0     | 25242.4 | 31013.5 | 42538.1 | 61880.7 | 87218.0  |          |
|             | 25270.6 | 31018.8 | 43308.3 | 61934.8 | 87414.3  |          |
|             | 25283.3 | 31029.4 | 43349.3 | 61939.4 | 87419.9  |          |
|             | 25324.7 | 31085.8 | 43627.0 | 61974.6 | 87567.9  |          |
|             | 25353.6 | 31103.3 | 43690.9 | 62018.2 | 87619.0  |          |
|             | 25460.1 | 31114.7 | 43773.8 | 62026.5 | 87730.7  |          |
|             | 25467.6 | 31178.0 | 43911.6 | 62040.7 | 87758.2  |          |
|             | 25492.1 | 31199.7 | 44437.4 | 62276.7 | 87836.2  |          |
|             | 25508.7 | 31204.4 | 44438.3 | 62278.0 | 88005.8  |          |
|             | 25543.9 | 31235.9 | 44543.1 | 63054.5 | 88011.7  |          |
|             | 25567.5 | 31310.4 | 44622.8 | 63057.0 | 89005.1  |          |
|             | 25638.6 | 31343.1 | 44733.2 | 66432.6 | 89013.6  |          |
|             | 25669.4 | 31344.9 | 44885.2 | 66889.2 | 97403.6  |          |
|             | 25731.2 | 31346.4 | 45041.4 | 67967.2 | 97715.8  |          |
|             | 25765.8 | 31349.9 | 45226.4 | 72062.9 | 97923.9  |          |
|             | 25831.0 | 31366.3 | 45247.3 | 72173.1 | 98013.2  |          |
|             | 25848.9 | 32812.2 | 45329.9 | 73049.2 | 98209.5  |          |
|             | 25873.1 | 32814.9 | 45351.3 | 73411.7 | 99150.2  |          |
|             | 25878.6 | 32963.2 | 45512.6 | 73496.7 | 99277.5  |          |
|             | 26017.4 | 33061.5 | 45517.5 | 76555.4 | 104970.6 |          |
|             | 26091.3 | 33137.9 | 56412.7 | 76558.7 | 104986.4 |          |
|             | 26366.5 | 34243.2 | 56440.6 | 76647.0 | 105148.4 |          |

|  |         |         |         |         |          |  |
|--|---------|---------|---------|---------|----------|--|
|  | 26398.3 | 34252.9 | 56725.6 | 76666.3 | 105462.6 |  |
|  | 26588.4 | 34332.7 | 56730.8 | 76669.2 | 105543.0 |  |

|          |          |          |          |          |
|----------|----------|----------|----------|----------|
| 0.00     | 14733.56 | 29370.93 | 34343.57 | 38258.31 |
| 483.01   | 15495.29 | 29438.33 | 34398.81 | 38356.42 |
| 898.30   | 15537.29 | 29458.51 | 34437.83 | 38414.50 |
| 993.99   | 15982.75 | 29486.71 | 34459.90 | 38446.54 |
| 1157.38  | 24816.31 | 29514.23 | 34526.42 | 38524.41 |
| 1229.84  | 24841.38 | 29902.12 | 34557.34 | 38594.38 |
| 1331.67  | 24955.60 | 29948.94 | 34571.09 | 38623.62 |
| 1608.07  | 25065.65 | 29976.87 | 34605.50 | 38694.67 |
| 3312.02  | 25409.36 | 30095.98 | 34644.20 | 38735.64 |
| 3704.24  | 26760.20 | 30117.78 | 34658.15 | 38773.96 |
| 3895.88  | 26893.64 | 30144.90 | 34706.12 | 38785.91 |
| 4013.41  | 26913.20 | 30182.72 | 34736.36 | 38890.23 |
| 4108.06  | 27089.55 | 30222.45 | 34814.11 | 38918.68 |
| 4248.96  | 27246.34 | 30238.51 | 34840.27 | 39038.15 |
| 4436.35  | 27302.75 | 30455.12 | 34885.11 | 39107.35 |
| 5803.34  | 27407.36 | 30870.32 | 34910.78 | 39139.33 |
| 5920.85  | 27465.41 | 31019.44 | 34939.13 | 39258.12 |
| 6044.41  | 27565.65 | 31045.35 | 35031.82 | 39312.67 |
| 6221.74  | 27613.76 | 31120.62 | 35689.39 | 39331.72 |
| 6401.40  | 27698.74 | 31237.33 | 35729.00 | 39345.45 |
| 6633.47  | 27727.93 | 31891.36 | 35786.56 | 39395.28 |
| 7567.55  | 27788.63 | 31898.09 | 35804.95 | 39428.58 |
| 7660.53  | 27806.89 | 31918.66 | 35885.20 | 39458.07 |
| 7810.25  | 27873.37 | 32002.72 | 36077.56 | 39555.59 |
| 8005.10  | 27903.04 | 32013.04 | 36136.61 | 39695.03 |
| 8299.74  | 27971.15 | 32034.93 | 36163.90 | 40043.64 |
| 8920.96  | 28060.32 | 32105.18 | 36293.79 | 40051.84 |
| 9017.36  | 28092.15 | 32117.88 | 36315.90 | 40057.32 |
| 9243.56  | 28144.50 | 32215.88 | 36457.53 | 40110.85 |
| 9593.84  | 28197.34 | 32268.10 | 36477.60 | 40140.25 |
| 10020.68 | 28261.20 | 32311.48 | 36516.41 | 40167.72 |
| 10117.33 | 28384.80 | 32365.57 | 36631.79 | 40177.88 |
| 10201.28 | 28443.40 | 32384.15 | 36696.94 | 40193.17 |
| 10323.42 | 28528.75 | 32468.11 | 36796.03 | 40227.50 |
| 10359.18 | 28542.81 | 32518.35 | 37206.62 | 40285.21 |
| 10403.45 | 28661.47 | 32575.17 | 37381.76 | 40361.00 |
| 10529.67 | 28710.12 | 32623.20 | 37420.13 | 40393.66 |
| 10576.18 | 28719.47 | 32672.24 | 37525.68 | 40419.98 |
| 10645.21 | 28790.19 | 32757.25 | 37732.91 | 40458.39 |
| 11641.70 | 28852.84 | 32774.16 | 37813.70 | 40510.40 |
| 11717.70 | 28951.89 | 32867.81 | 37902.23 | 40809.76 |
| 11756.28 | 28964.96 | 32880.20 | 37924.77 | 40979.55 |
| 11787.92 | 29084.58 | 32950.20 | 37948.79 | 41053.52 |
| 11868.53 | 29104.82 | 33027.26 | 37977.83 | 41081.06 |
| 13237.11 | 29140.17 | 33123.26 | 37998.91 | 41102.57 |

|          |          |          |          |          |
|----------|----------|----------|----------|----------|
| 13397.23 | 29198.57 | 33166.87 | 38036.62 | 41116.11 |
| 13442.18 | 29220.23 | 33286.09 | 38044.13 | 41137.52 |
| 13482.05 | 29256.11 | 33478.42 | 38051.56 | 41150.53 |
| 14547.33 | 29273.41 | 33560.81 | 38107.77 | 41187.73 |
| 14688.74 | 29284.91 | 33640.92 | 38141.28 | 41217.15 |

|          |          |          |          |           |           |
|----------|----------|----------|----------|-----------|-----------|
| 41250.65 | 50487.22 | 63862.09 | 73684.94 | 86576.92  | 104535.95 |
| 41373.32 | 50642.87 | 63897.27 | 74653.71 | 86670.94  | 104698.05 |
| 41536.23 | 50705.88 | 64022.20 | 75378.39 | 89018.18  | 104940.50 |
| 41548.26 | 50846.51 | 64044.29 | 75693.51 | 89465.60  | 105086.22 |
| 41636.10 | 50971.09 | 64431.98 | 76017.78 | 89752.43  | 109964.59 |
| 42592.69 | 51038.95 | 64504.79 | 78257.20 | 90158.27  | 110442.73 |
| 42646.47 | 51072.58 | 64571.14 | 78597.22 | 90359.11  | 110609.47 |
| 42668.39 | 51110.81 | 64663.88 | 78925.10 | 90419.28  | 111003.31 |
| 42743.40 | 51213.65 | 64698.01 | 79300.49 | 90937.15  | 111054.38 |
| 42784.17 | 51235.27 | 64802.22 | 79812.89 | 91298.47  | 111105.48 |
| 42819.06 | 51364.13 | 64906.26 | 80837.27 | 91478.04  | 111147.48 |
| 42949.62 | 51397.50 | 64983.87 | 81580.01 | 91585.91  | 111295.62 |
| 43069.82 | 51449.65 | 65144.89 | 81779.27 | 91714.25  | 111325.39 |
| 43160.22 | 51486.94 | 65794.59 | 81828.45 | 91854.96  | 111435.22 |
| 43219.43 | 51636.01 | 65925.07 | 81857.99 | 91947.59  | 111645.78 |
| 43299.72 | 51717.76 | 66035.40 | 81926.15 | 92068.87  | 111701.01 |
| 43482.77 | 51822.40 | 66103.62 | 81935.94 | 92144.16  | 111805.14 |
| 43836.02 | 51912.25 | 66152.38 | 81966.20 | 92197.49  | 111956.00 |
| 43931.86 | 52064.63 | 66185.75 | 81985.05 | 92454.76  | 112085.68 |
| 44115.32 | 52298.66 | 66247.74 | 81998.35 | 92881.92  | 112205.30 |
| 44164.49 | 52351.64 | 66531.97 | 82008.78 | 93105.42  | 112331.29 |
| 45151.19 | 60365.15 | 66817.49 | 82030.97 | 93285.46  | 112908.43 |
| 45183.68 | 60602.23 | 66943.18 | 82046.97 | 93358.28  |           |
| 45296.37 | 60726.99 | 67041.12 | 82072.42 | 93401.56  |           |
| 45892.43 | 60744.13 | 67087.44 | 82097.06 | 93523.43  |           |
| 46140.26 | 60809.24 | 67121.49 | 82141.09 | 93781.22  |           |
| 46589.33 | 60874.08 | 67163.51 | 82188.88 | 93861.71  |           |
| 46612.02 | 60932.86 | 67256.49 | 82219.45 | 94099.78  |           |
| 47364.44 | 60953.69 | 67414.94 | 82250.12 | 94236.33  |           |
| 47411.11 | 61029.30 | 67736.99 | 82327.67 | 94353.04  |           |
| 47578.11 | 61172.68 | 67868.30 | 82378.97 | 94449.32  |           |
| 48064.75 | 61219.99 | 67951.31 | 82431.21 | 94586.64  |           |
| 48149.41 | 61372.15 | 67999.65 | 82452.28 | 94615.91  |           |
| 48573.18 | 61406.79 | 68014.11 | 82753.60 | 94780.53  |           |
| 48902.90 | 61471.58 | 68080.19 | 82903.88 | 94847.97  |           |
| 48970.62 | 61529.38 | 68234.54 | 83082.06 | 95083.19  |           |
| 49014.25 | 61597.10 | 68530.68 | 83206.35 | 95440.34  |           |
| 49122.65 | 61636.56 | 68686.90 | 83333.92 | 95981.96  |           |
| 49214.12 | 61744.22 | 68773.90 | 83405.73 | 101545.27 |           |
| 49305.34 | 61897.80 | 68803.22 | 83631.14 | 102155.27 |           |
| 49321.13 | 62145.78 | 68900.51 | 85075.97 | 102489.14 |           |
| 49521.86 | 62206.70 | 68973.24 | 85274.55 | 102804.24 |           |

|          |          |          |          |           |  |
|----------|----------|----------|----------|-----------|--|
| 49546.99 | 62270.34 | 69509.96 | 85386.37 | 103033.81 |  |
| 49741.79 | 63047.87 | 69654.16 | 85793.36 | 103415.28 |  |
| 49818.05 | 63733.03 | 69711.79 | 85875.94 | 103542.69 |  |
| 49907.44 | 63777.21 | 70203.08 | 86151.18 | 103950.83 |  |
| 50241.86 | 63790.59 | 70775.15 | 86173.94 | 104036.16 |  |
| 50371.00 | 63794.02 | 71605.52 | 86576.92 | 104143.16 |  |

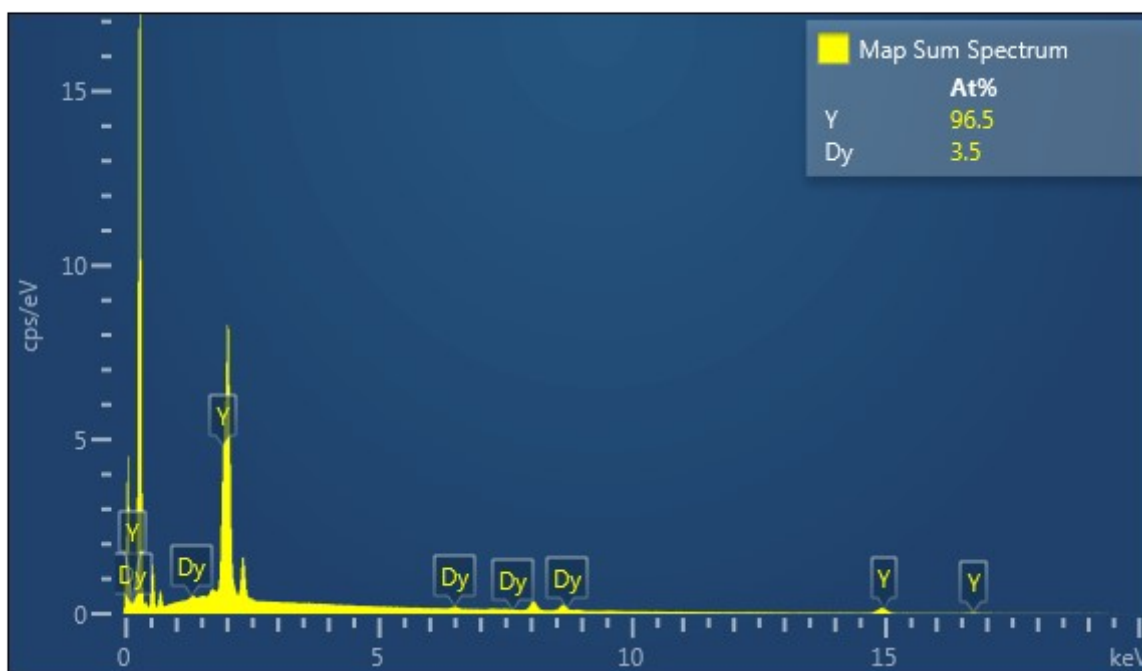

**Figure S10.** EDS spectrum of **1-Y(Dy)**. The spectrum was analysed by FESEM model JSM 7200F with FEG source.

## References

1. P. Kalita, N. Ahmed, A. K. Bar, S. Dey, A. Jana, G. Rajaraman, J.-P. Sutter and V. Chandrasekhar, *Inorg. Chem.*, 2020, **59**, 6603-6612.
2. A. K. Bar, P. Kalita, J.-P. Sutter and V. Chandrasekhar, *Inorg. Chem.*, 2018, **57**, 2398-2401.
